# Supplementary material for: Multi-omics study revealing the complexity and spatial heterogeneity of tumor-infiltrating lymphocytes in primary liver carcinoma
Source: PubMed Central journal article supplement (PMC5471016; doi:10.18632/oncotarget.16758), 2017-03-31
Supplement: oncotarget-08-34844-s001.pdf [file oncotarget-08-34844-s001.pdf]

# Multi-omics study revealing the complexity and spatial heterogeneity of tumor-infiltrating lymphocytes in primary liver carcinoma

## Supplementary Materials

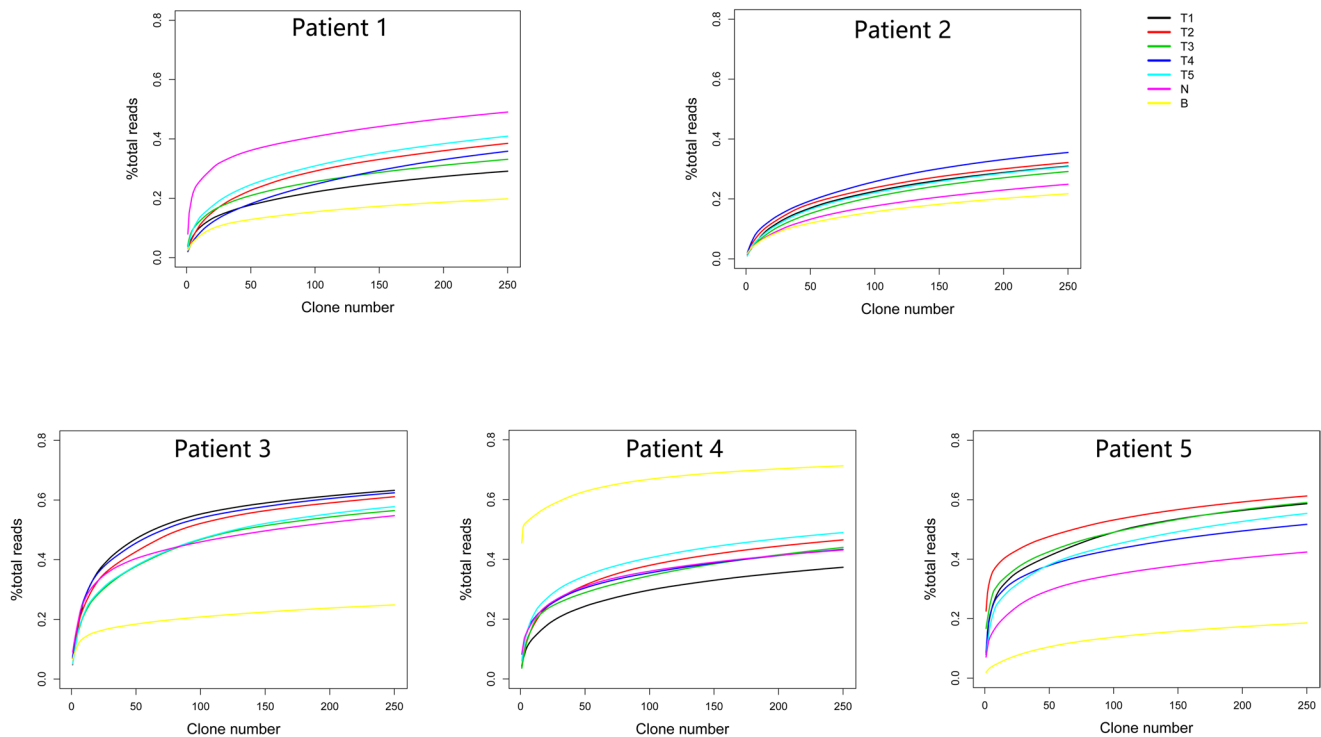

**Supplementary Figure 1: The cumulative size of the TOP250 in five PLC patients.** The x-axis depicts the number of clones included (starting from the most expanded clones). The y-axis shows the percentage of TCR $\beta$  sequences that are covered by the included clones.

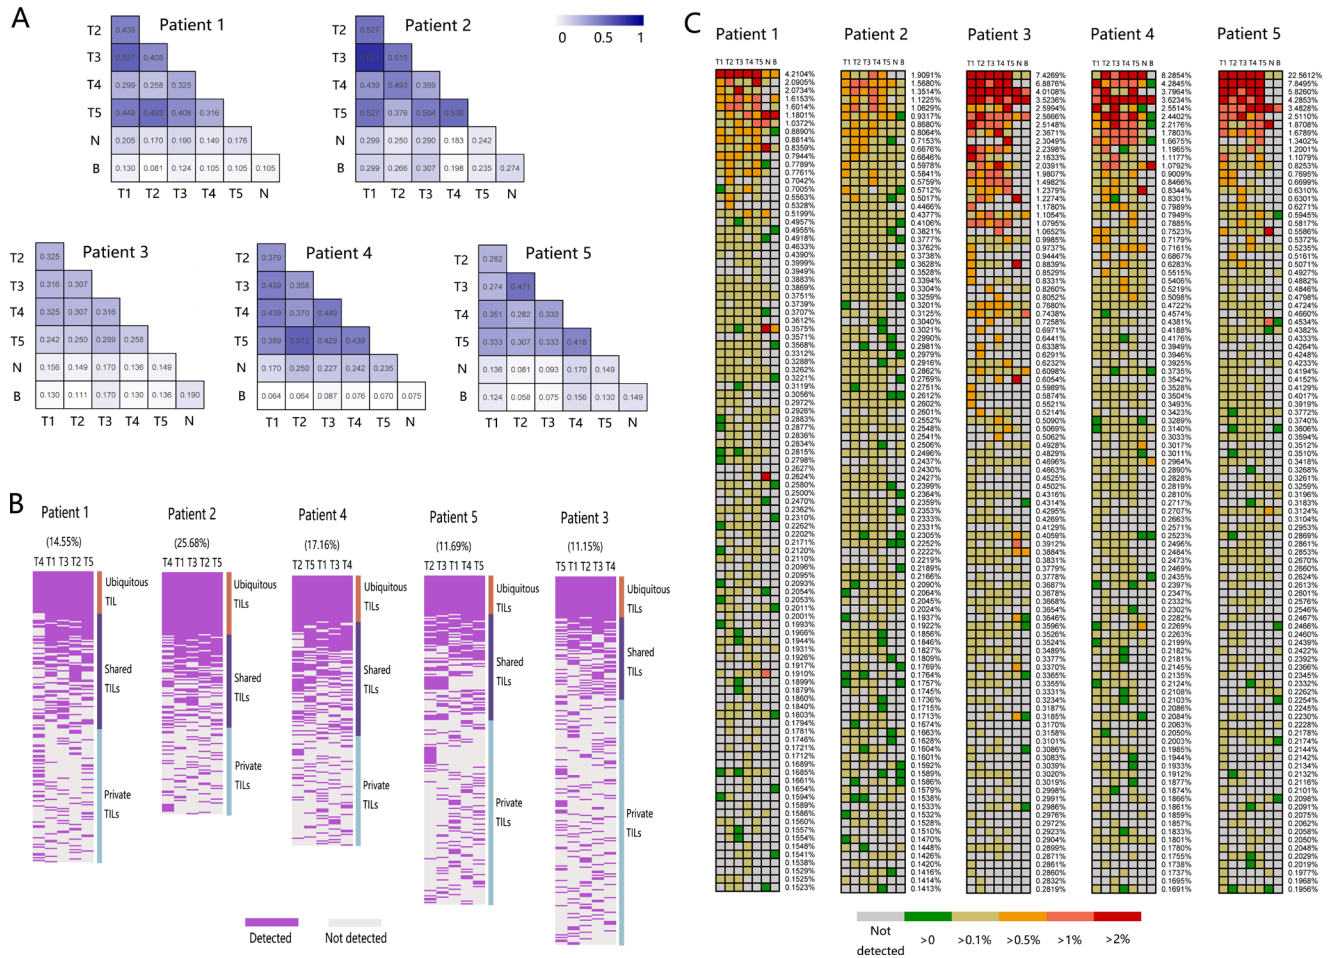



**P1T1**

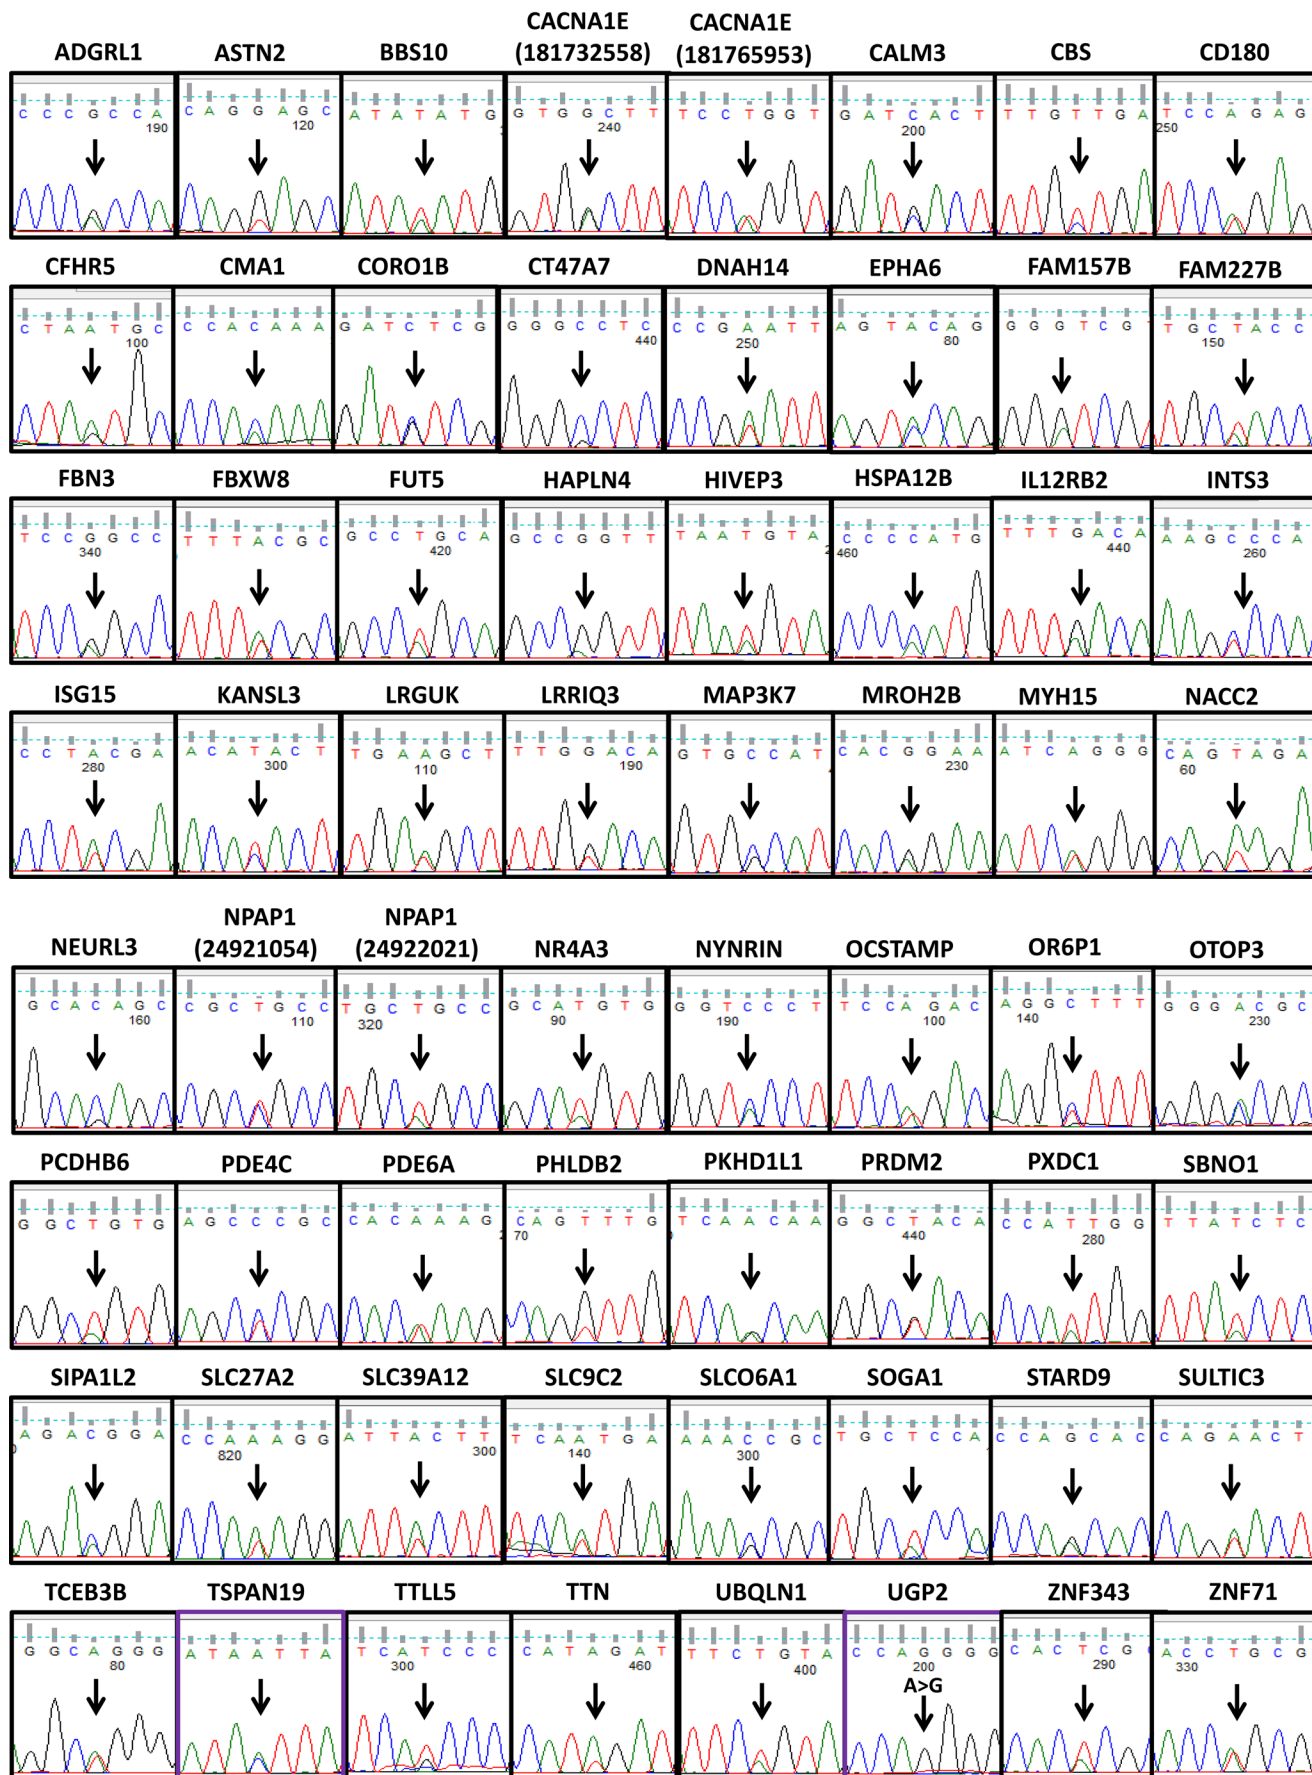

**P1T2**

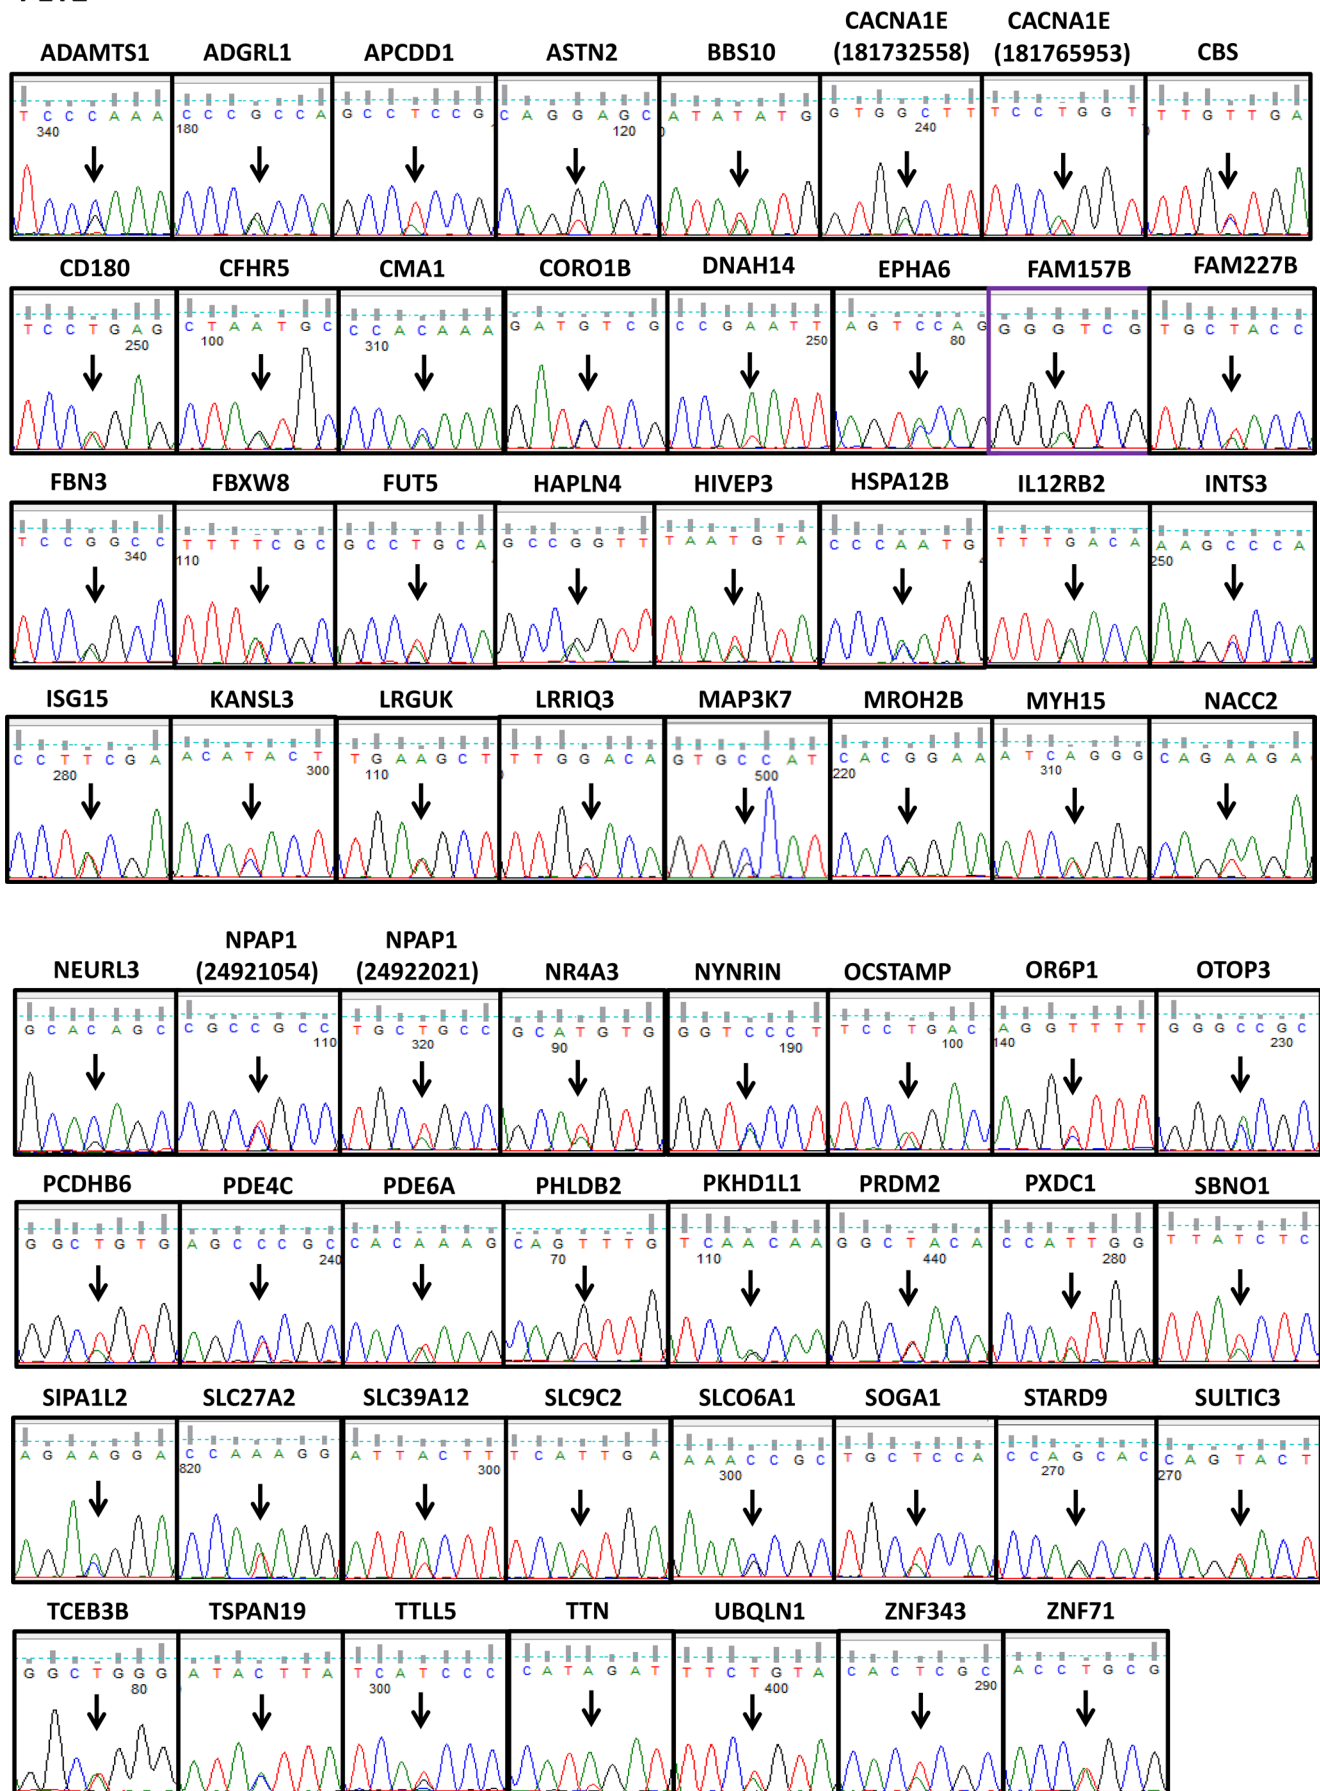

P1T3

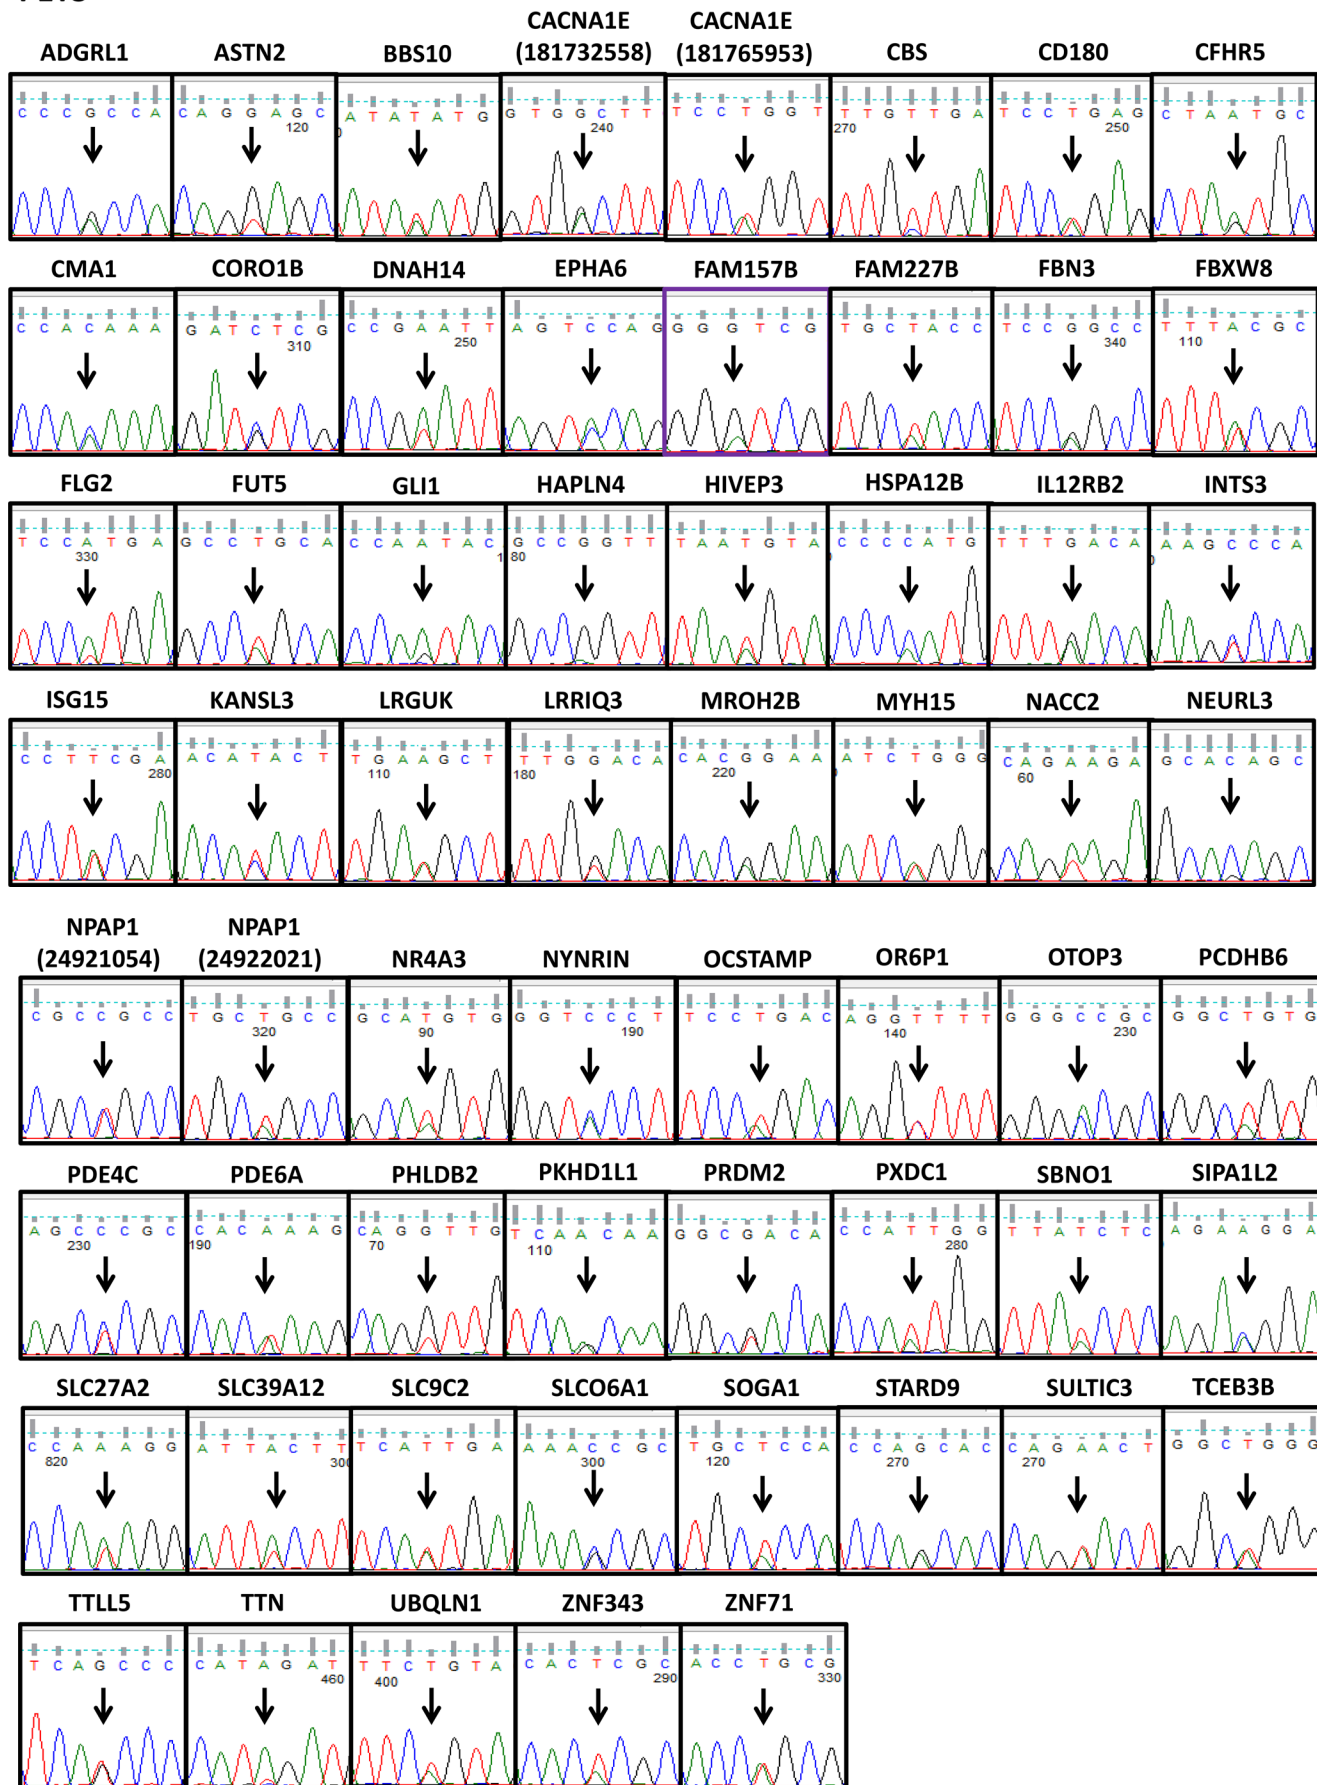

**P1T4**

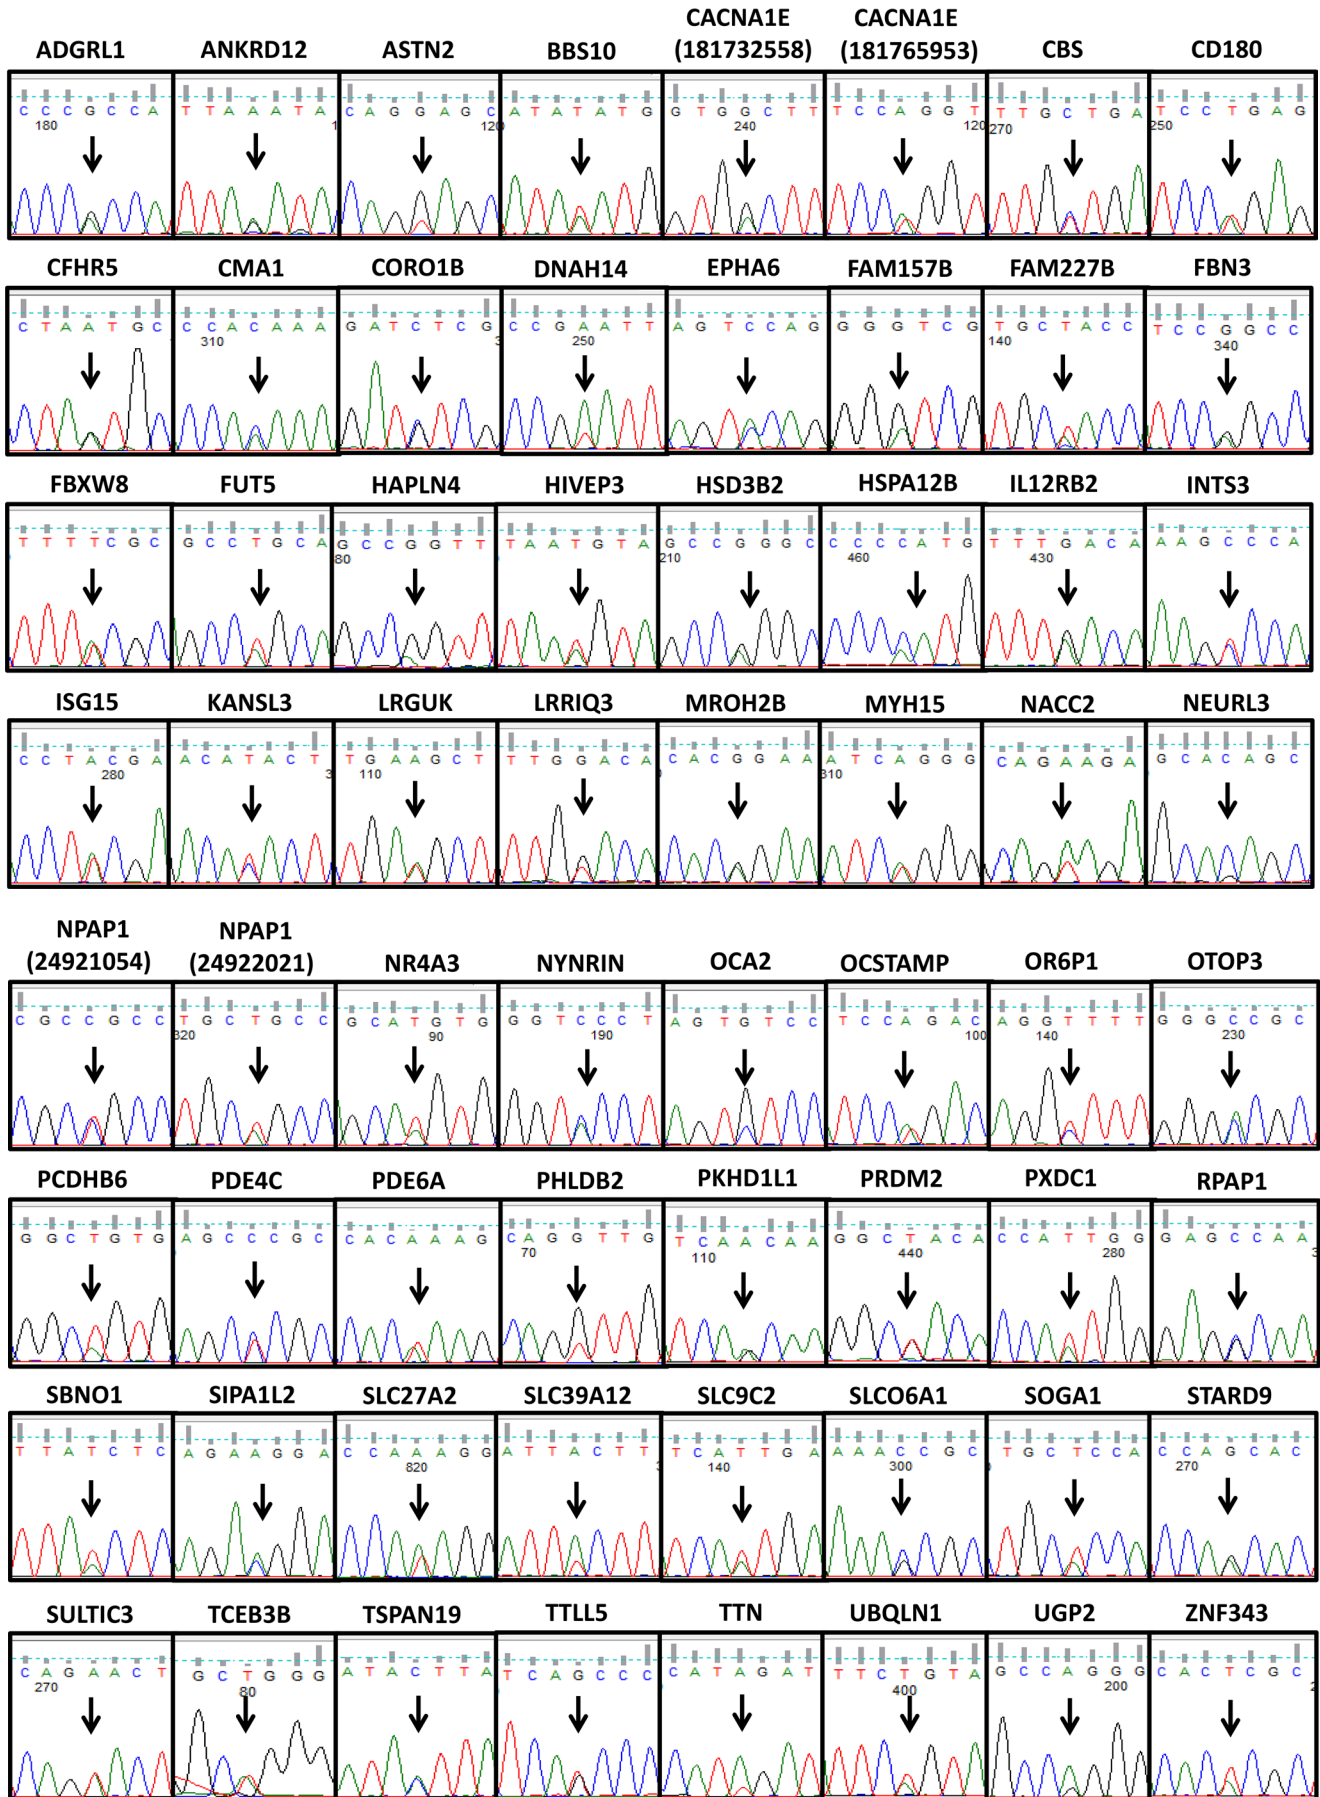

ZNF71

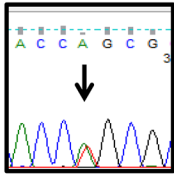

P1T5

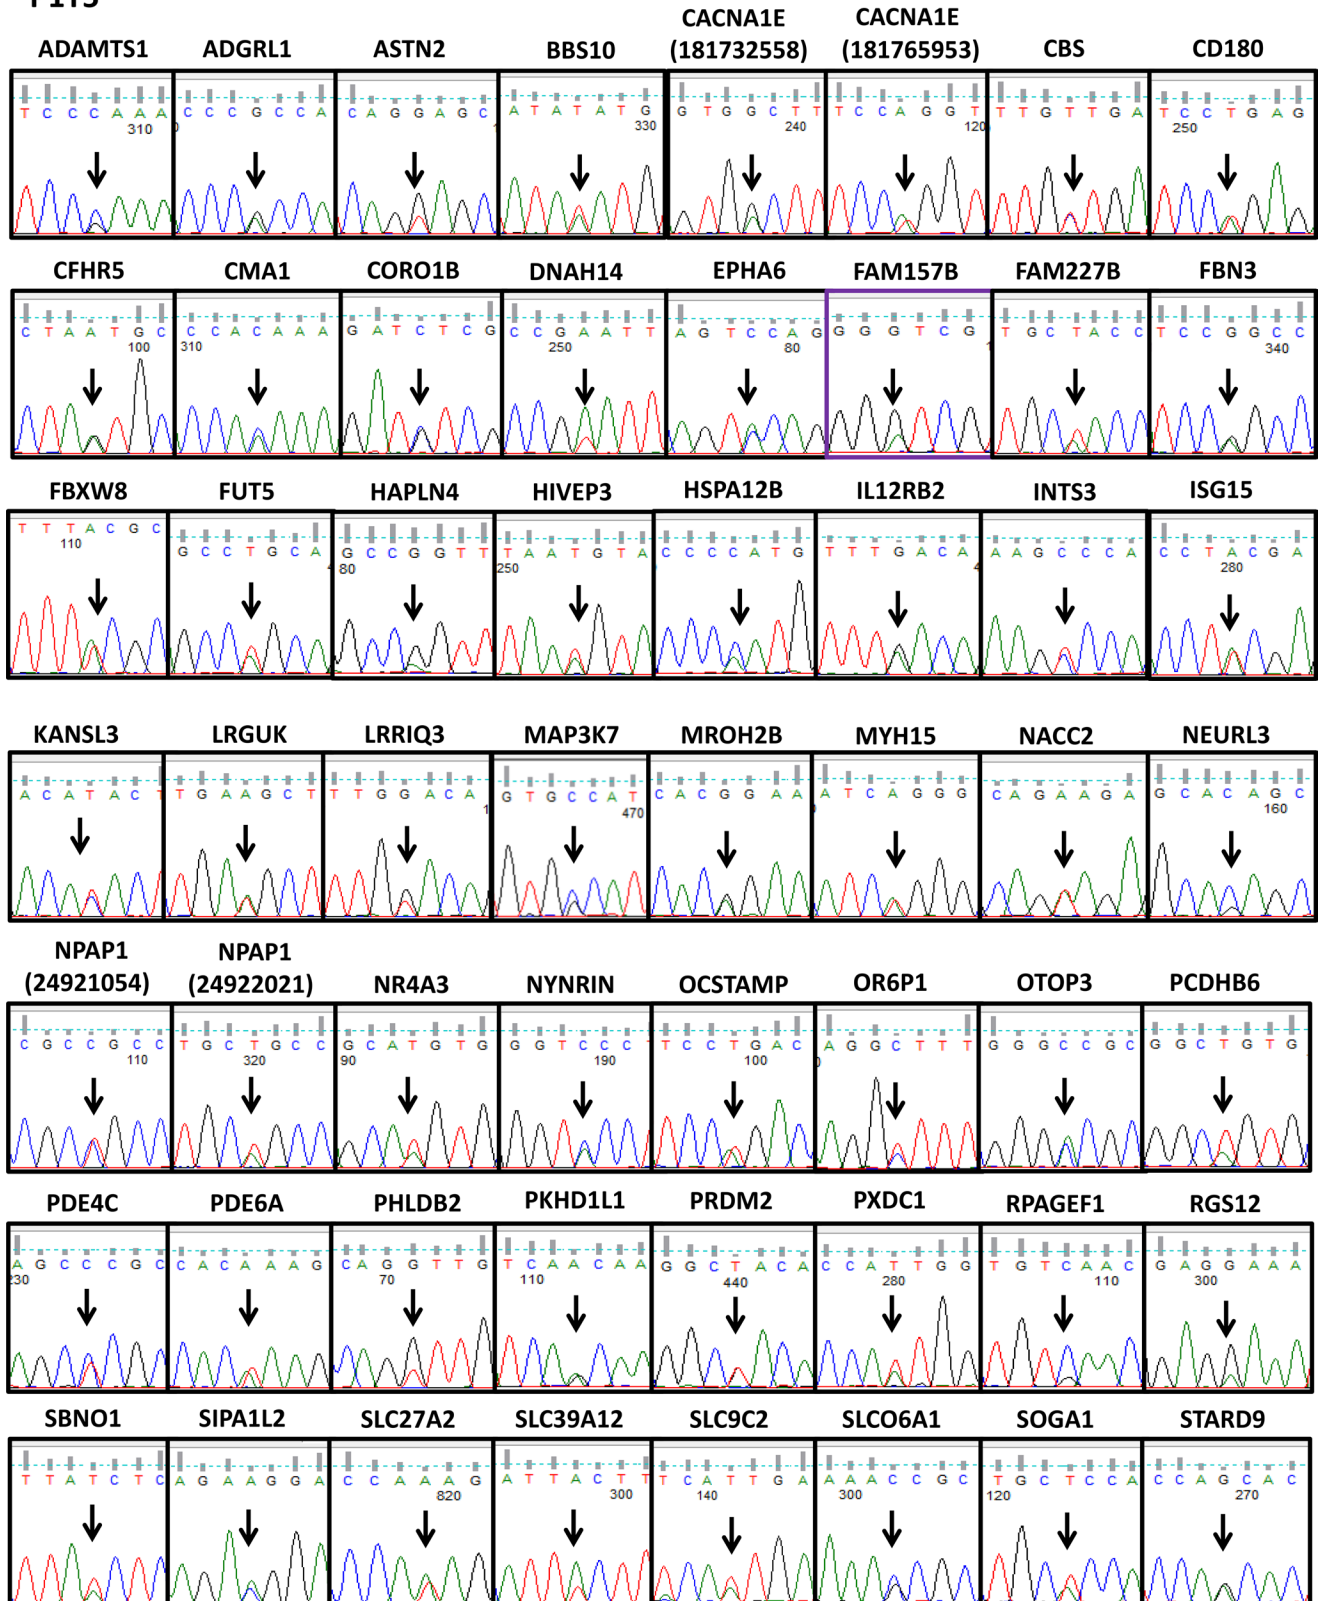



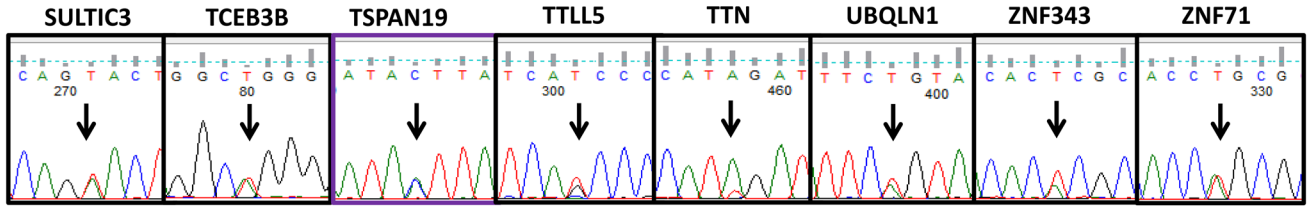

**P2T1**

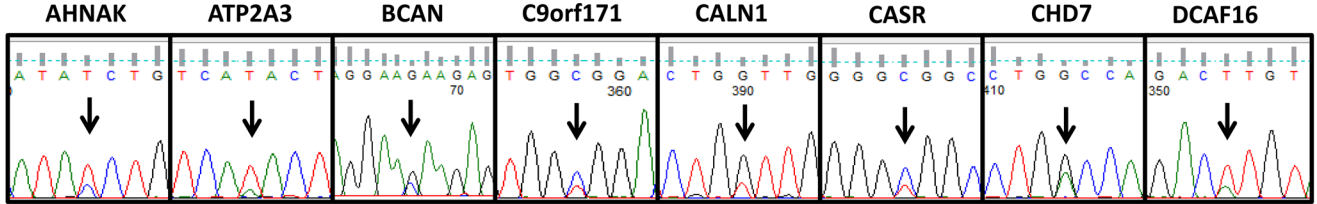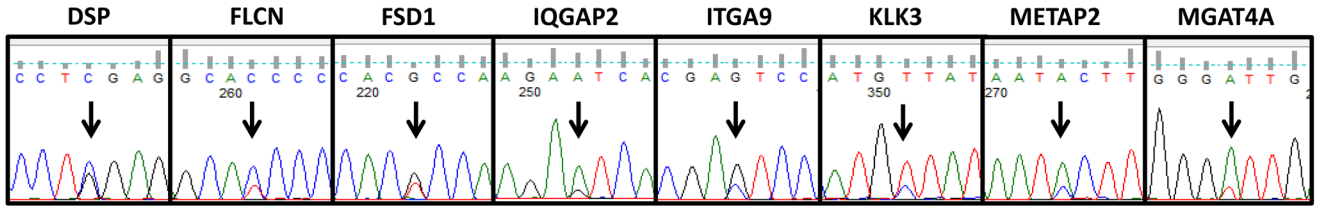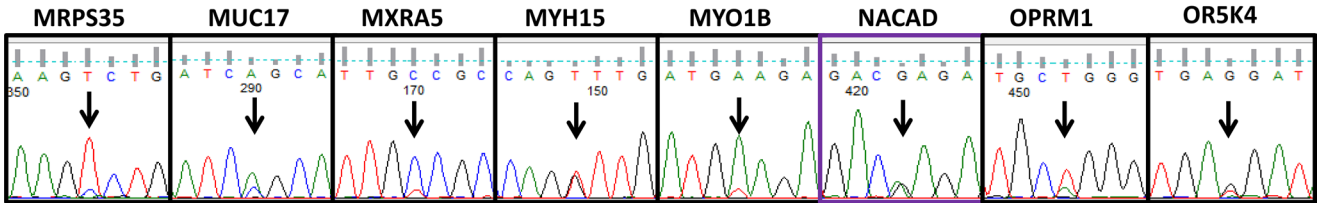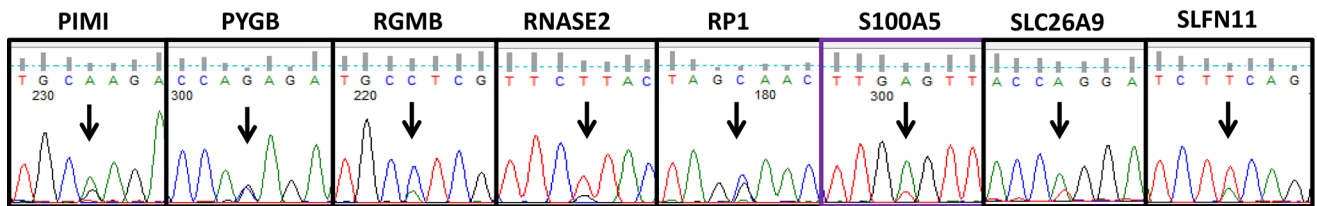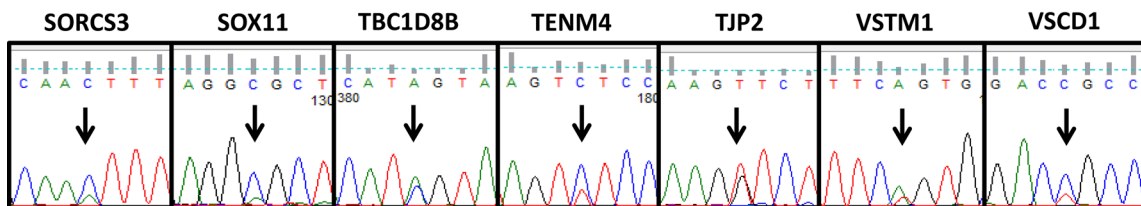

**P2T2**

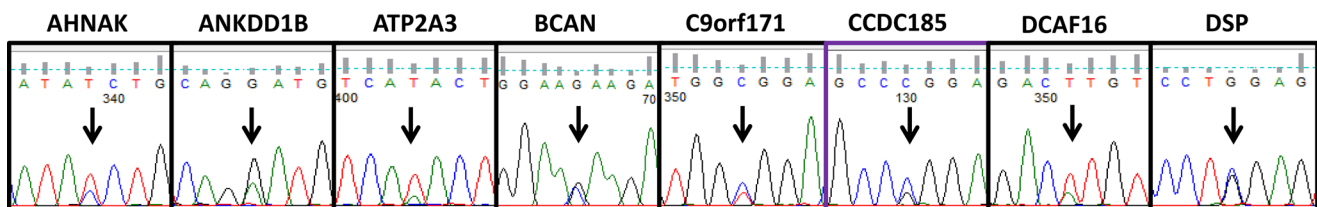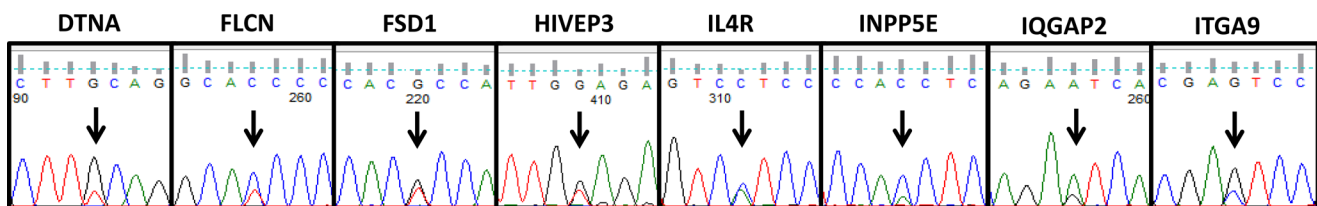



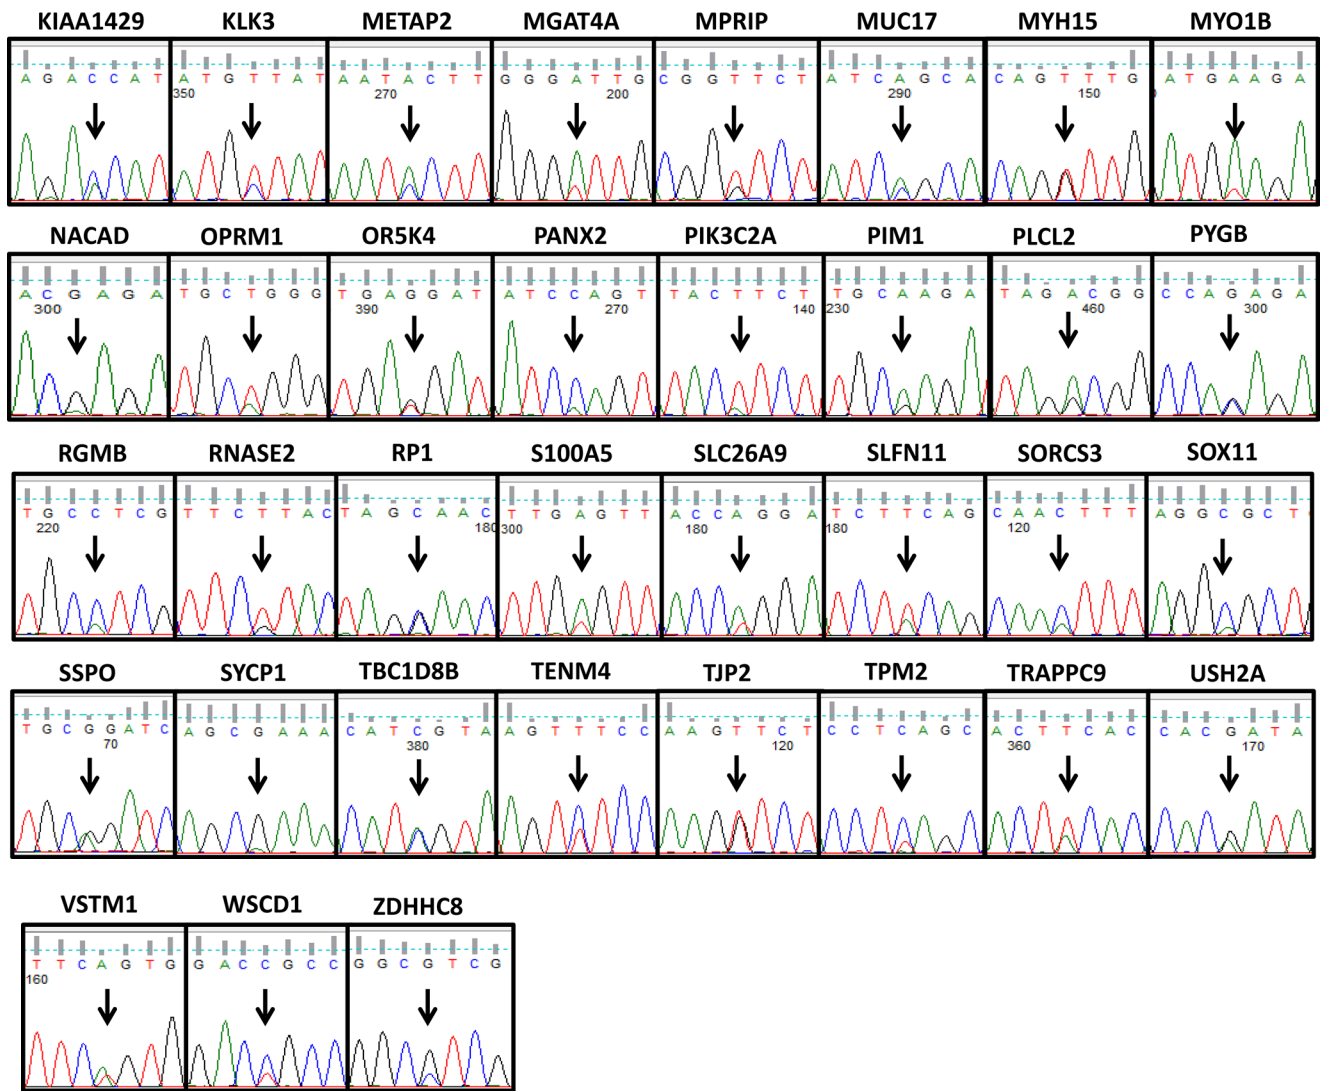

**P2T3**

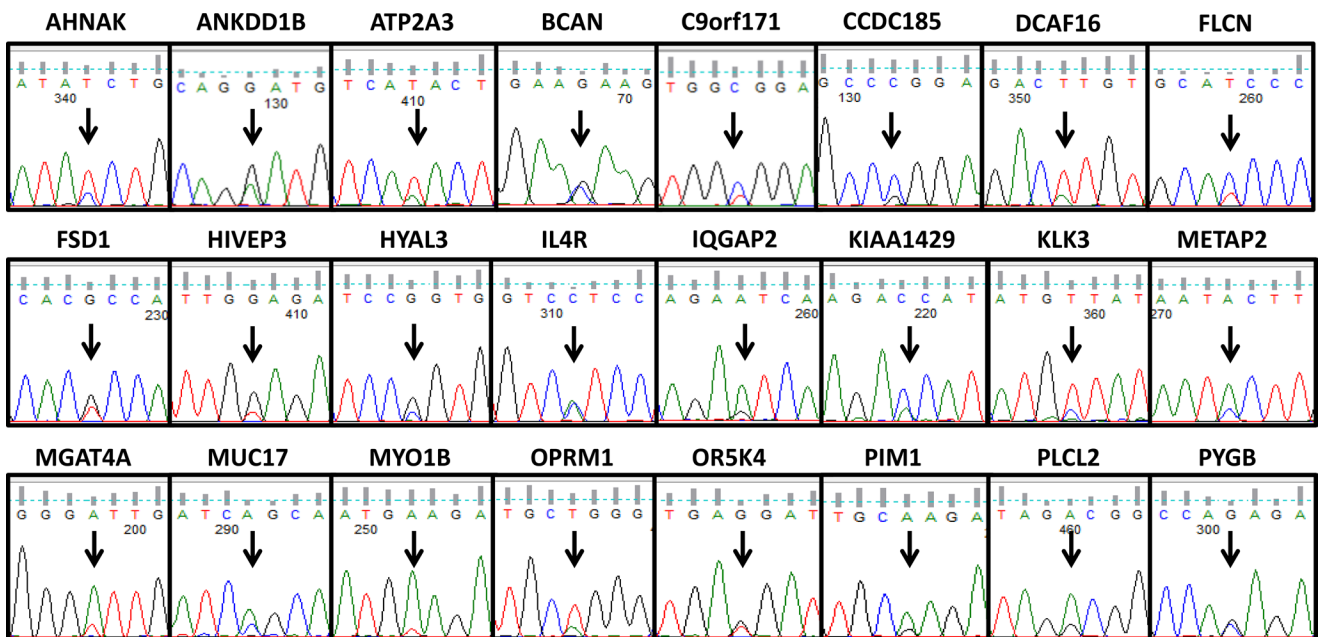

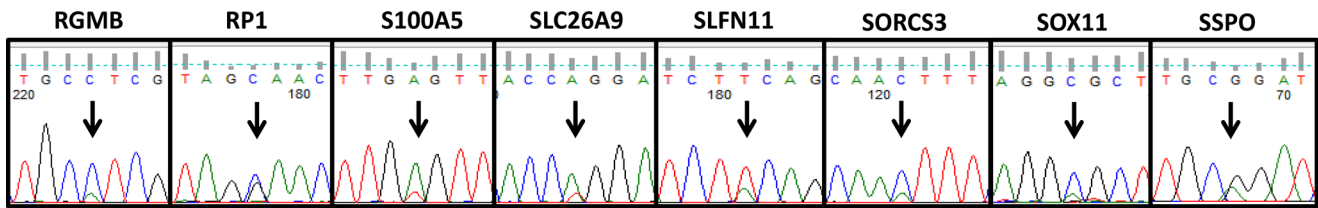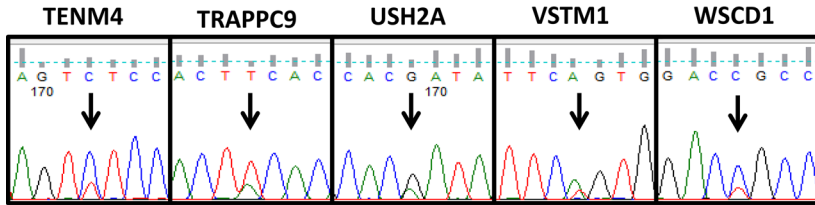

**P2T4**

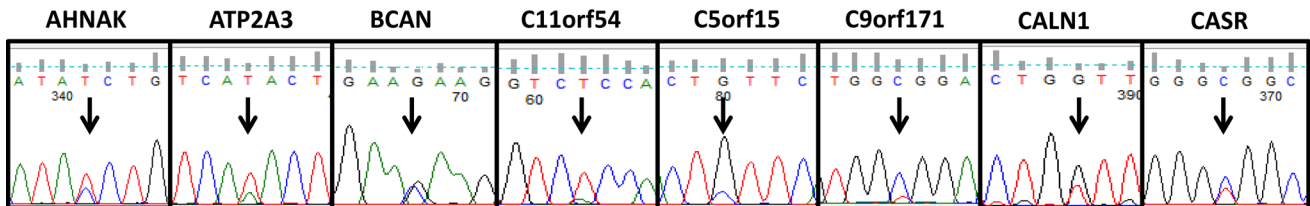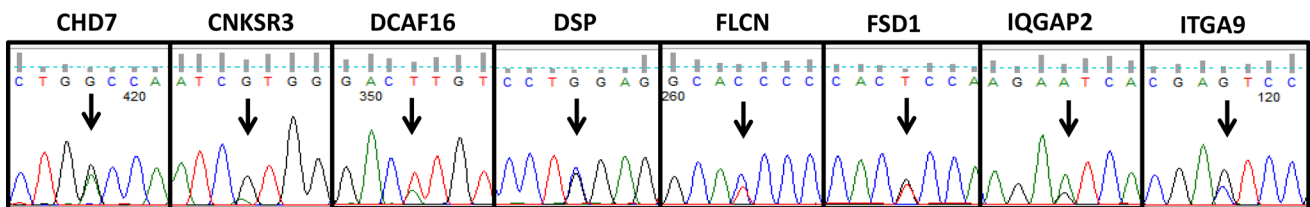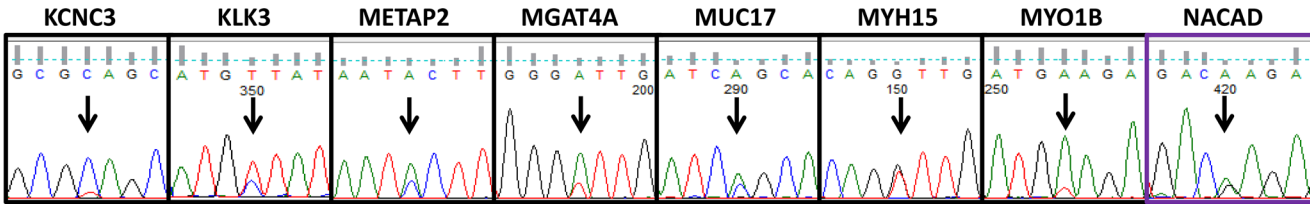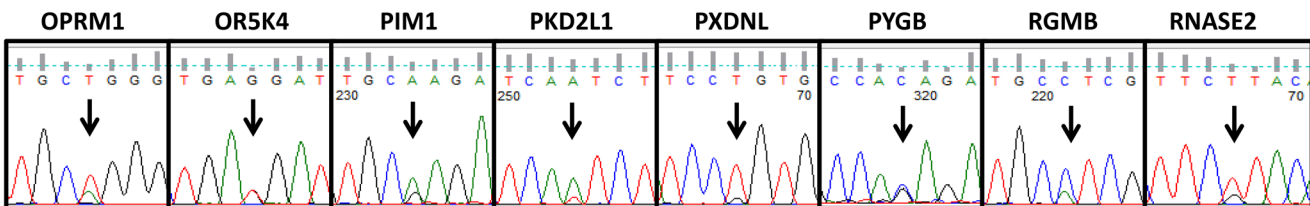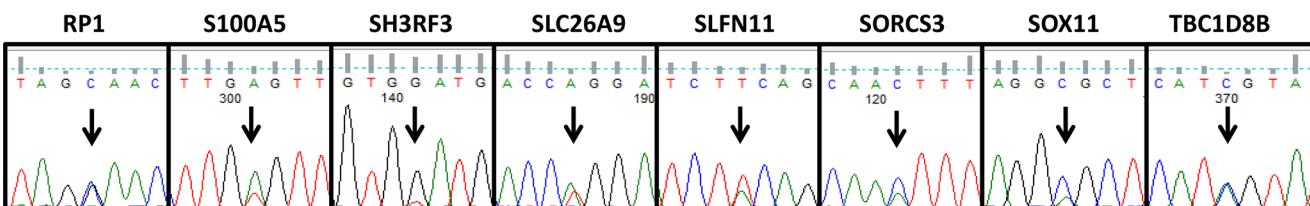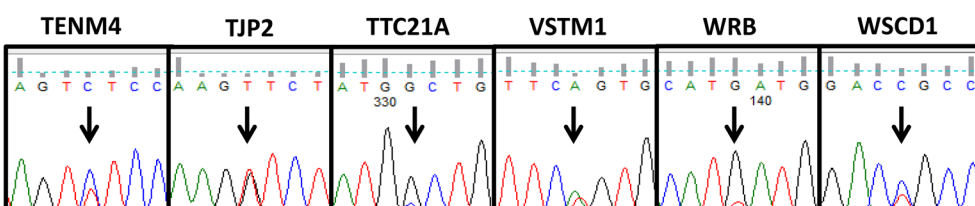

**P2T5**

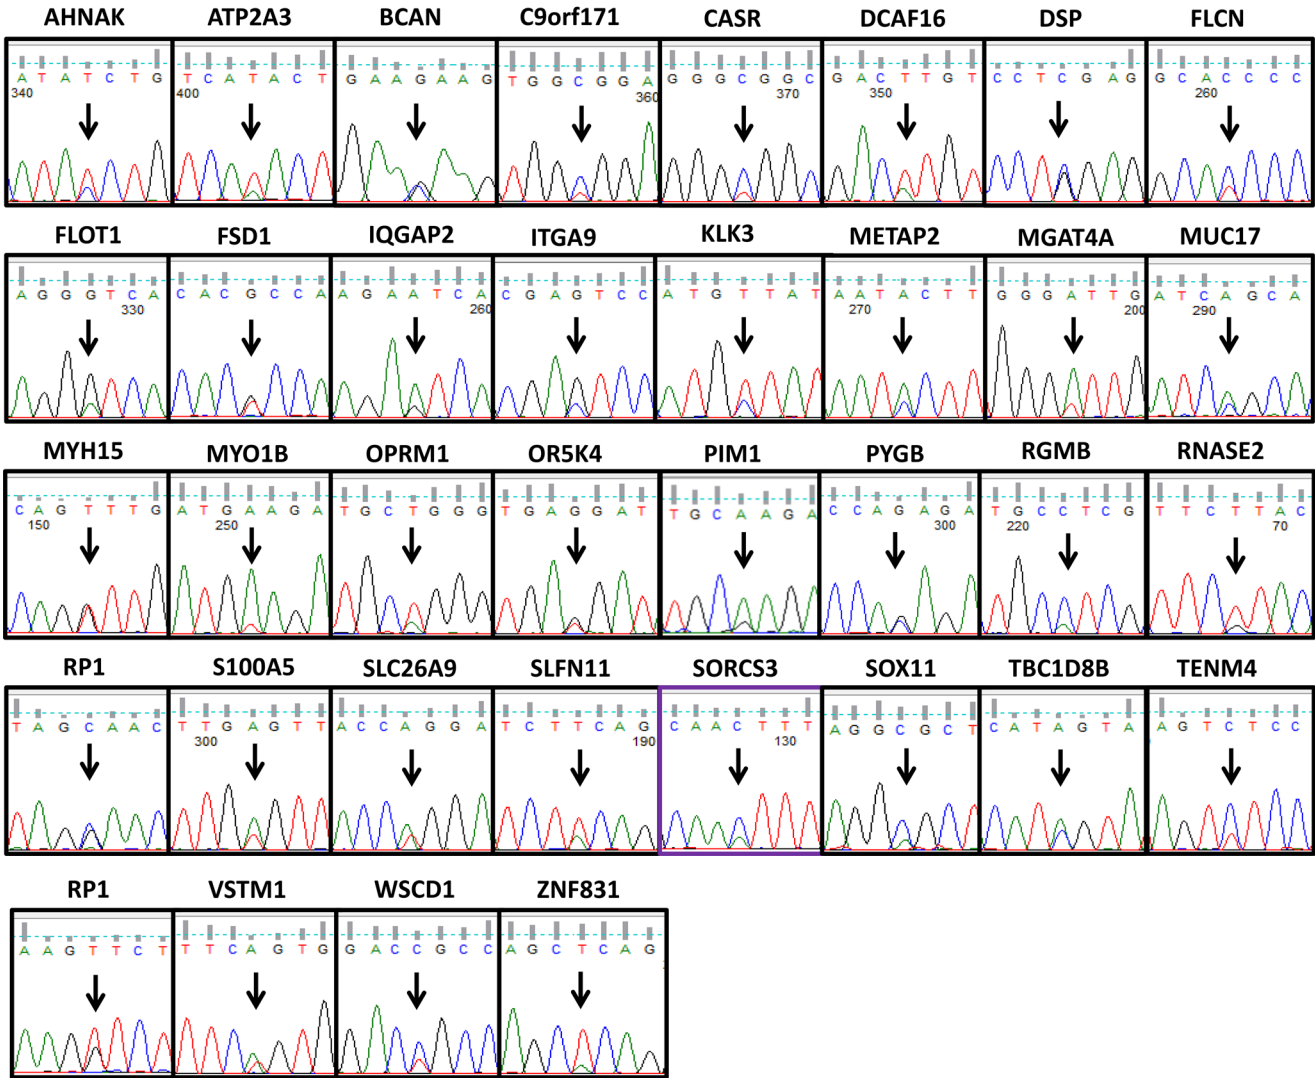

**P3T1**

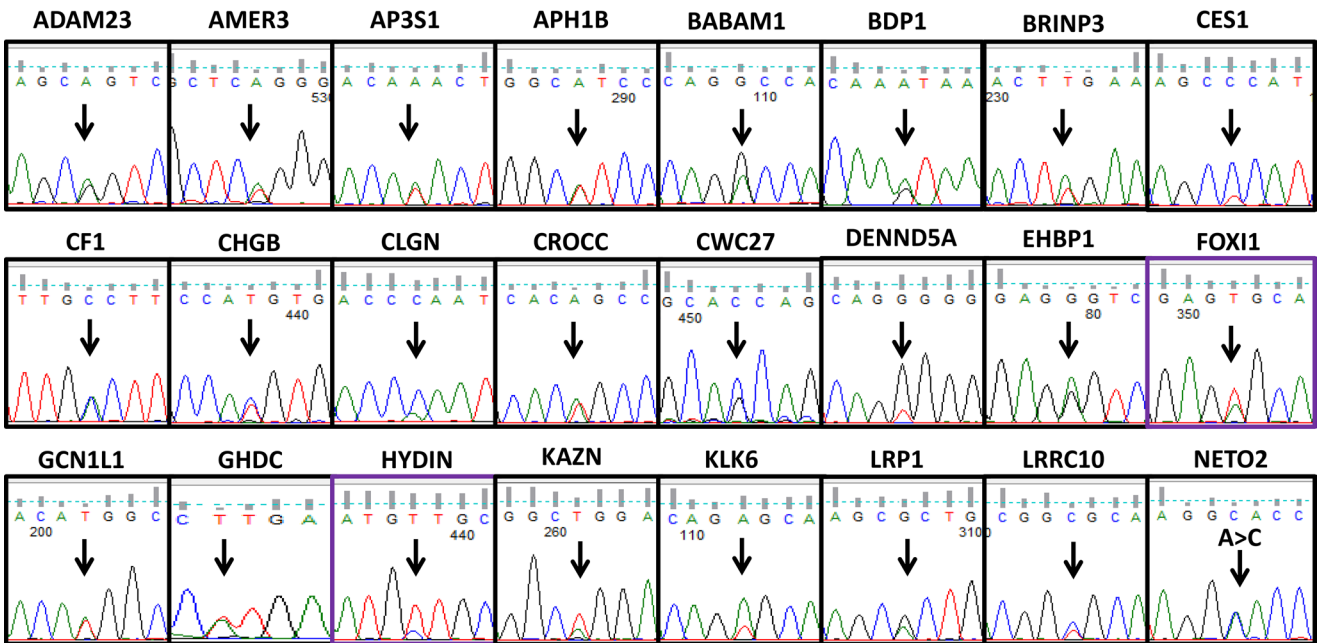

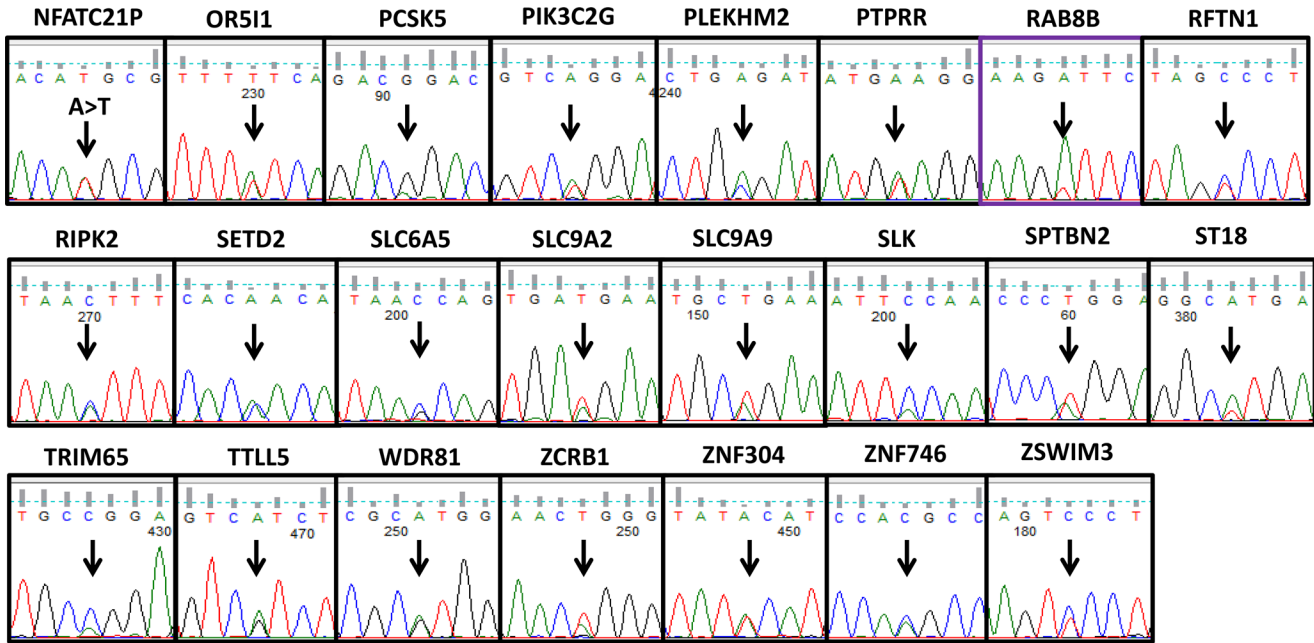

**P3T2**

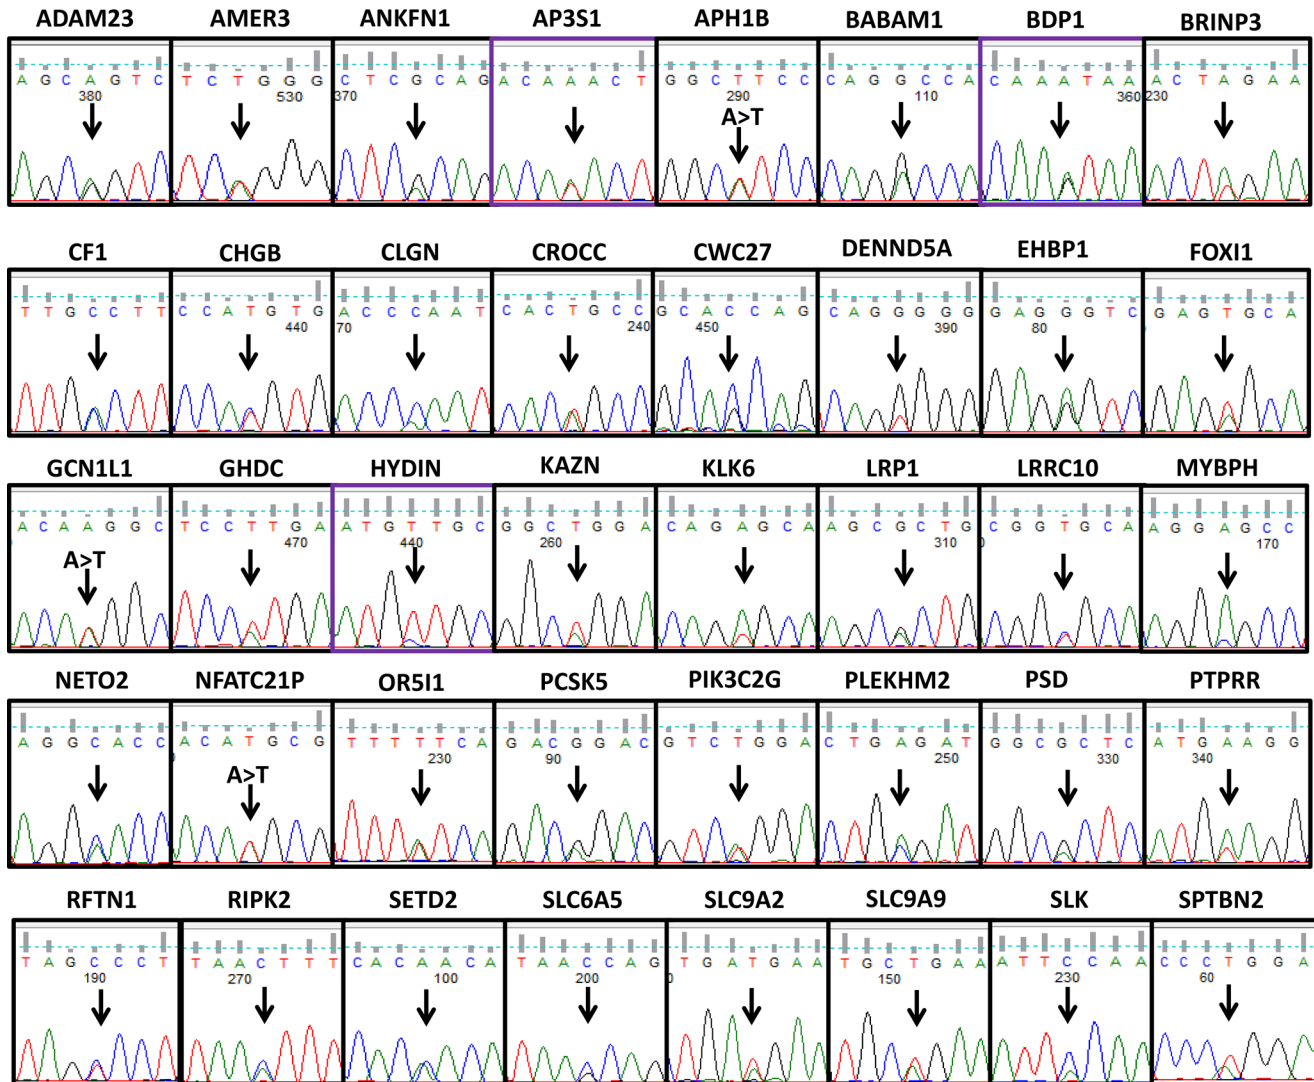

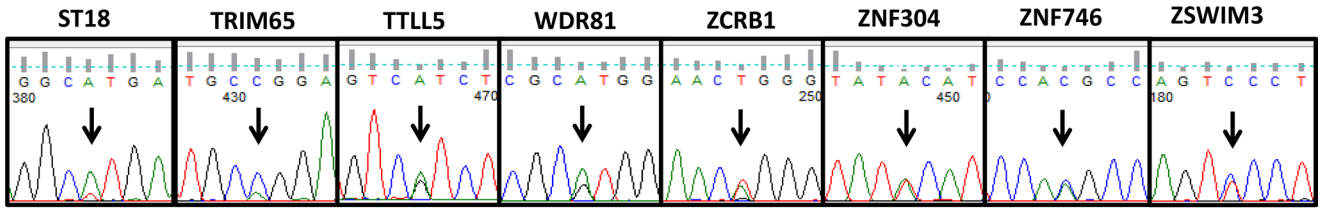

**P3T3**

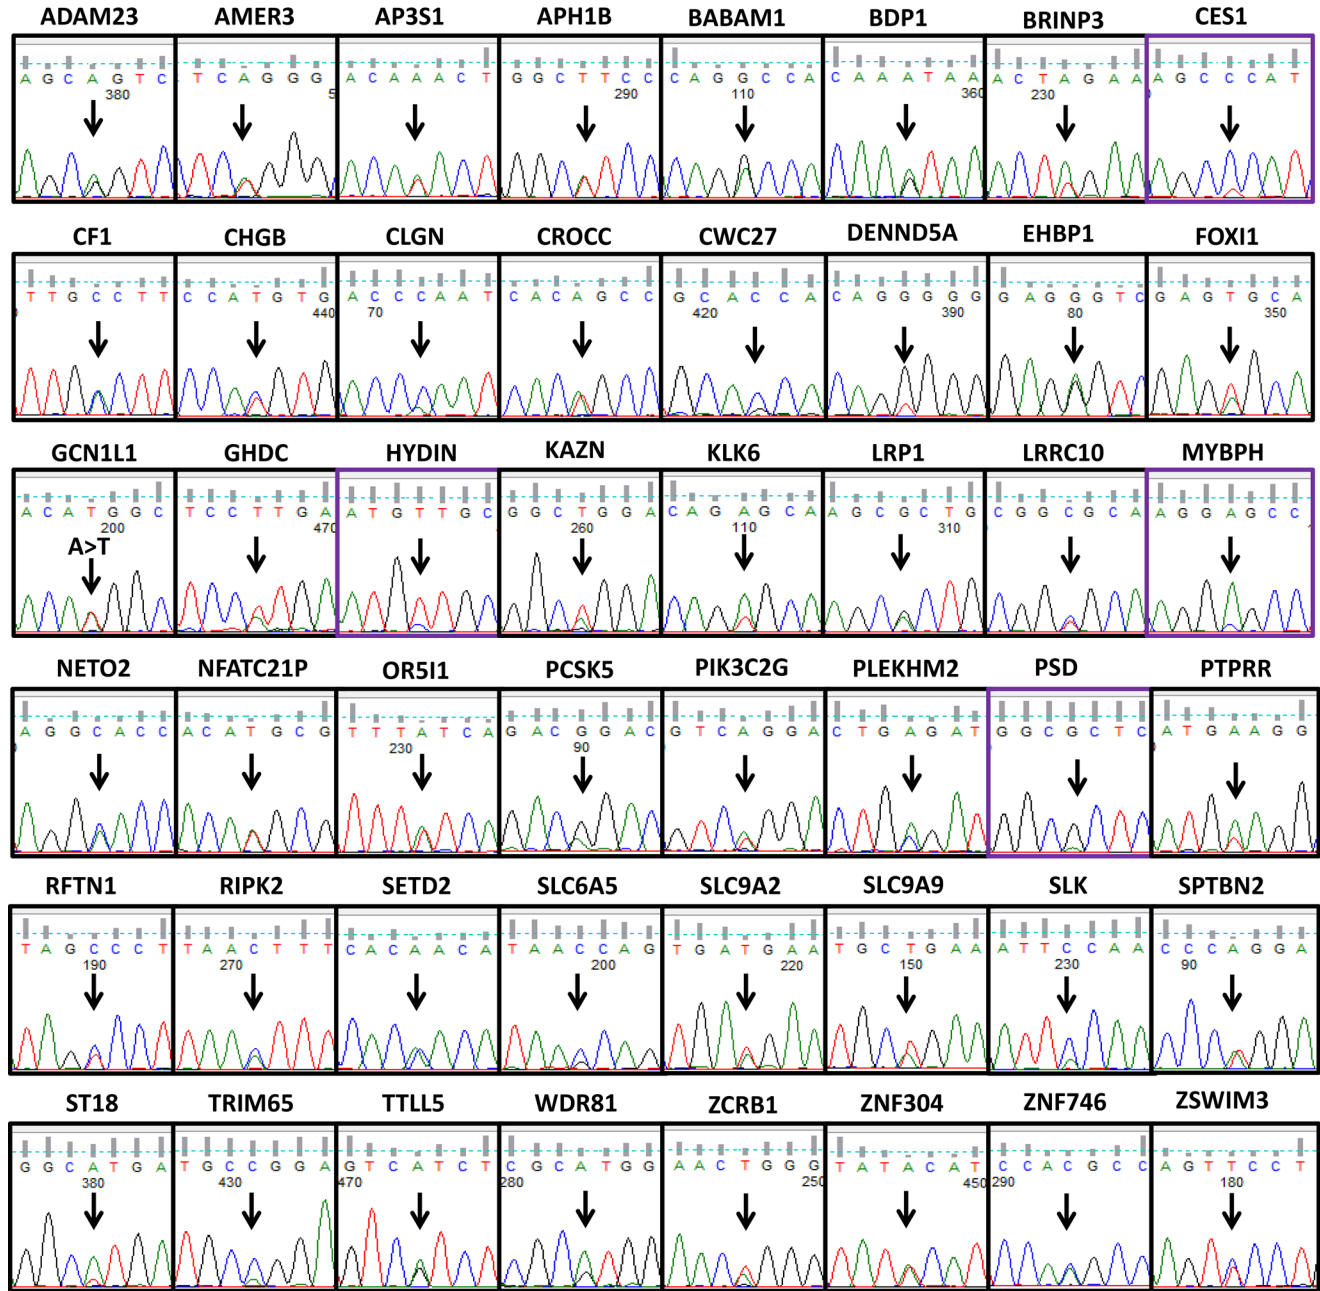

**P3T4**

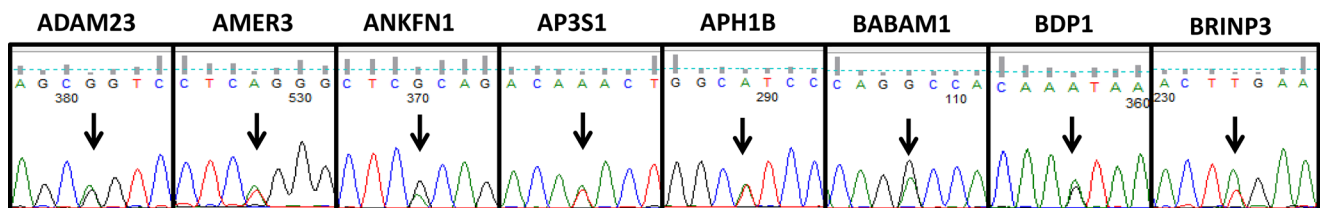



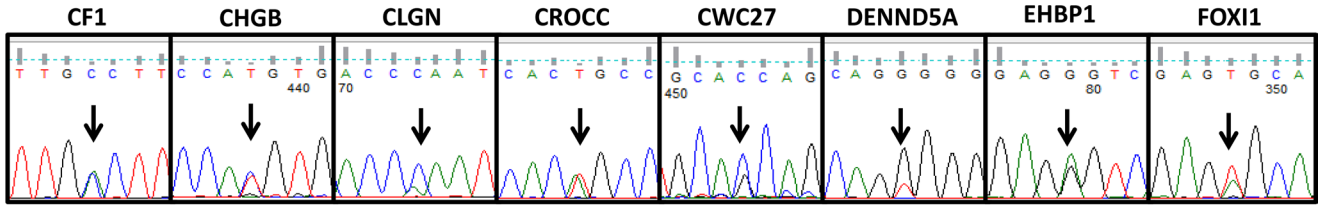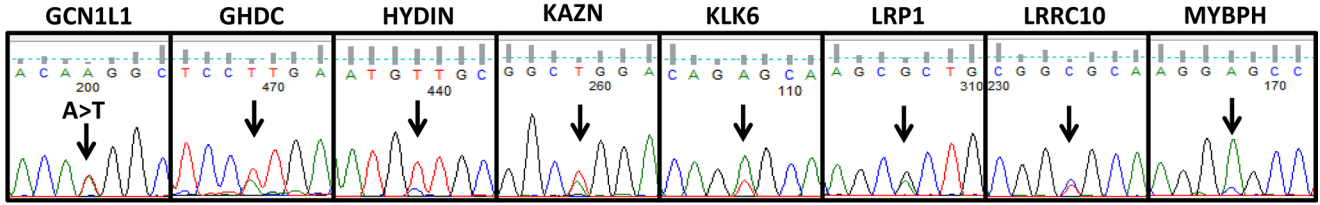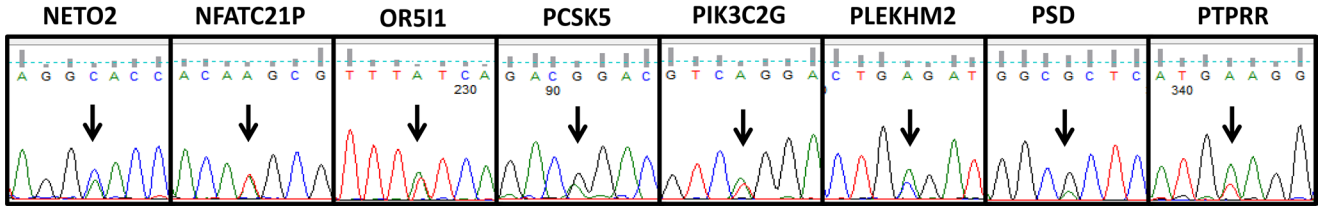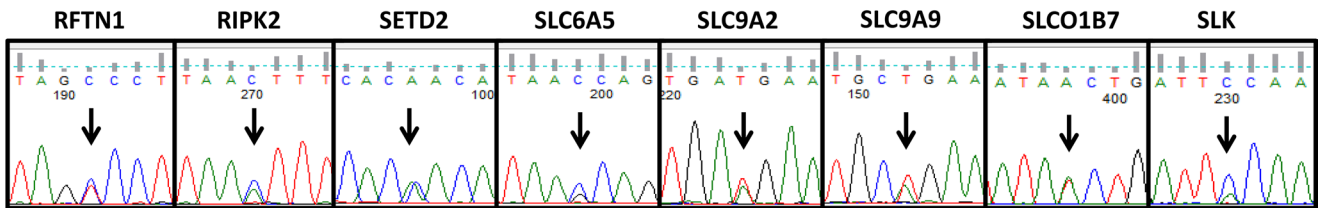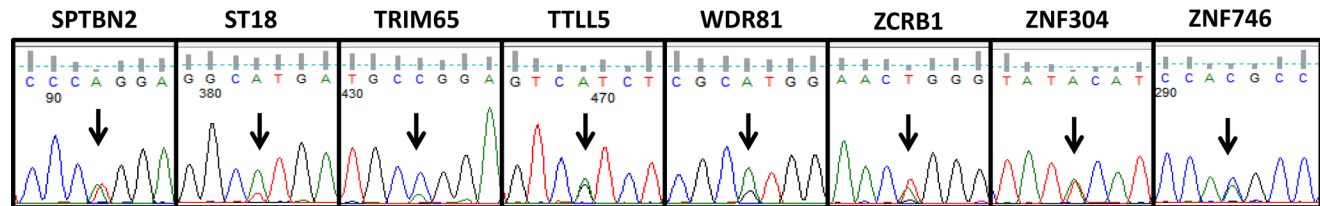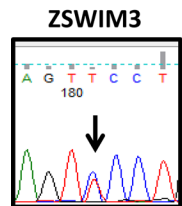

**P3T5**

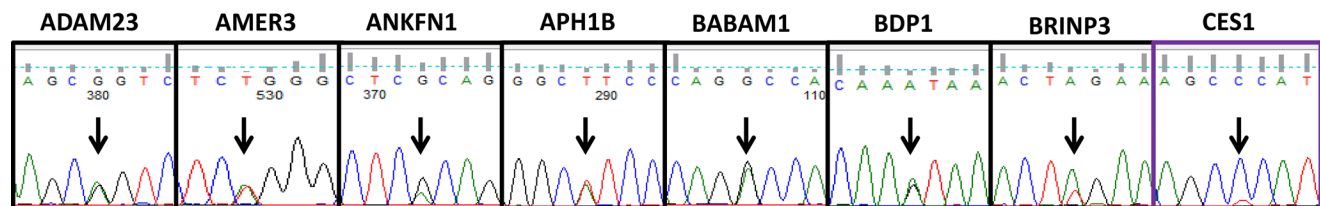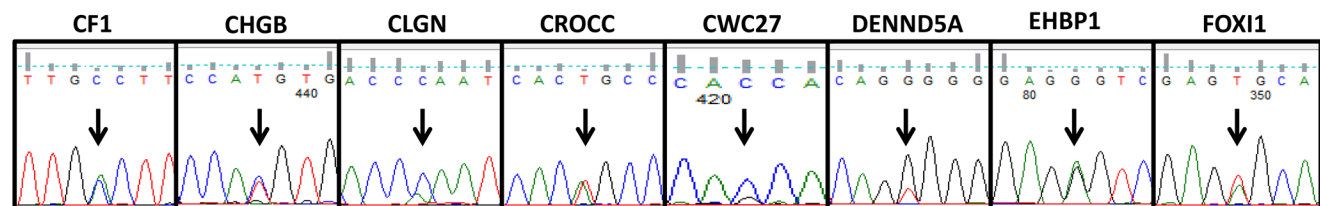



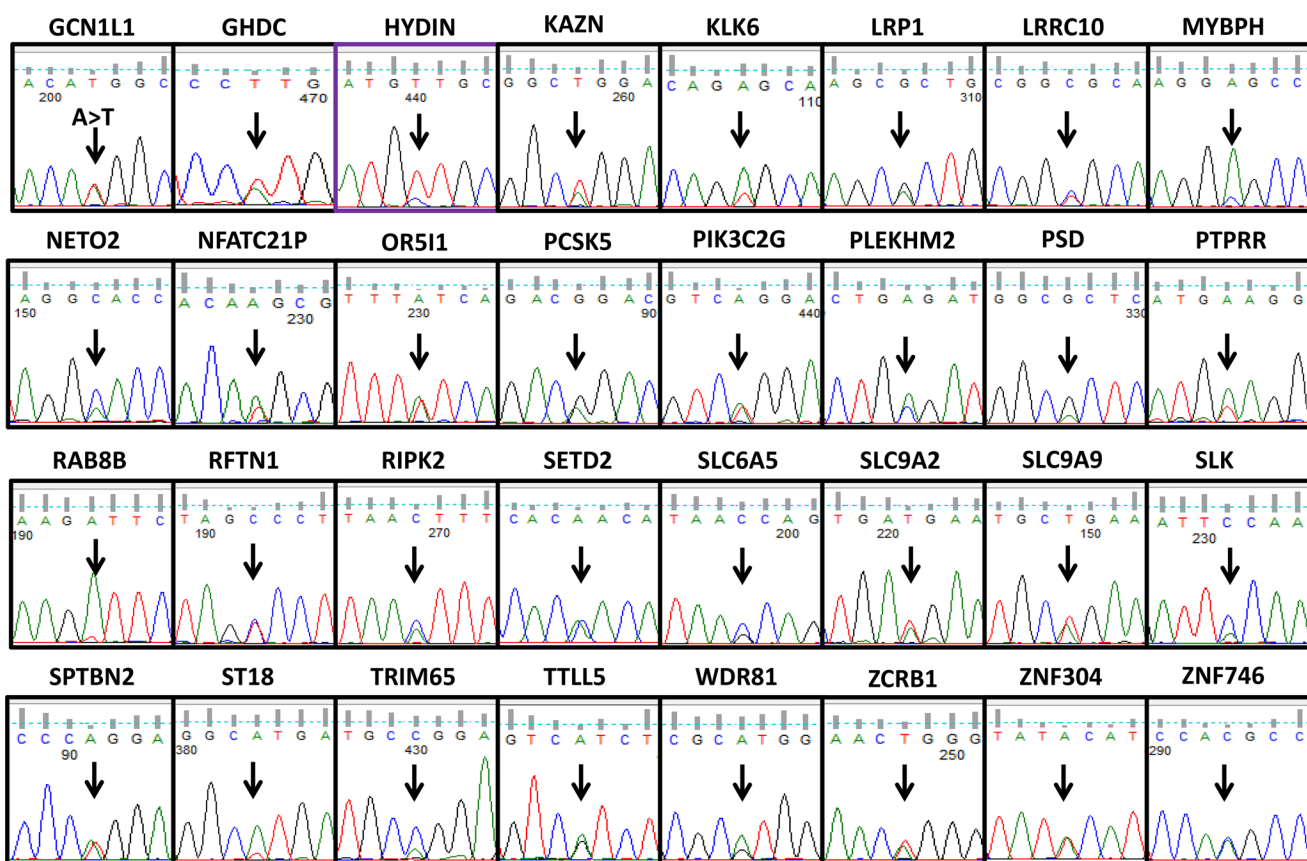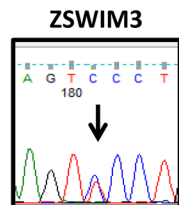

**P4T1**

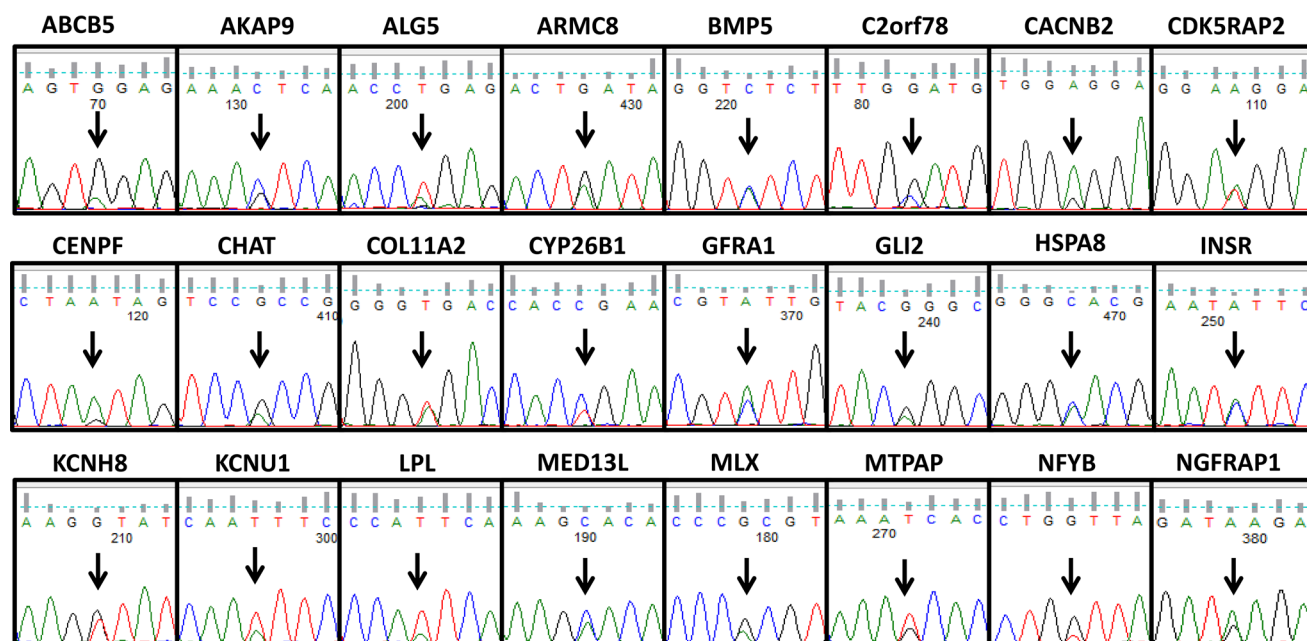

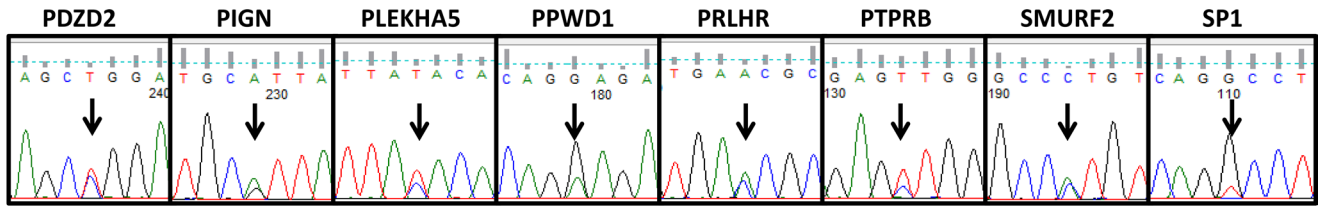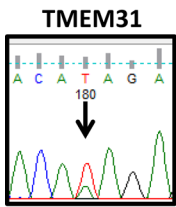

**P4T2**

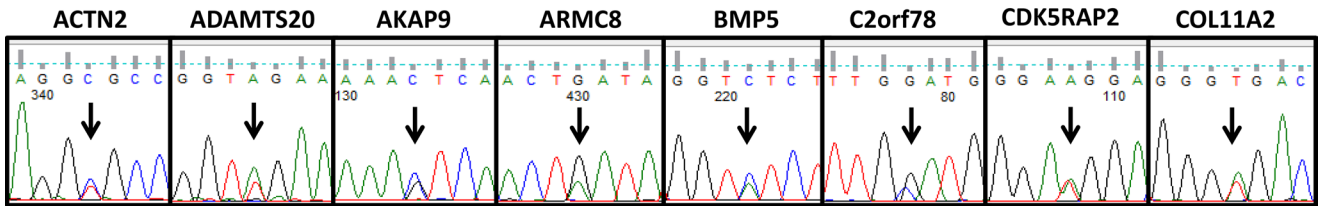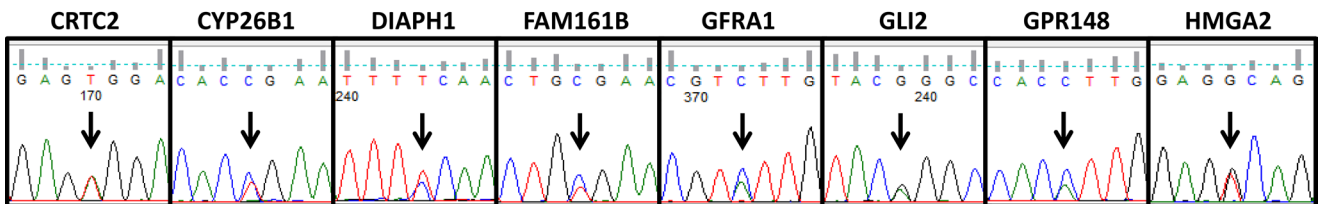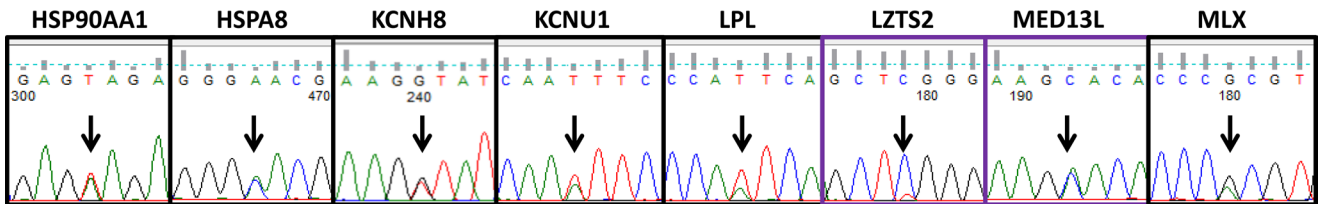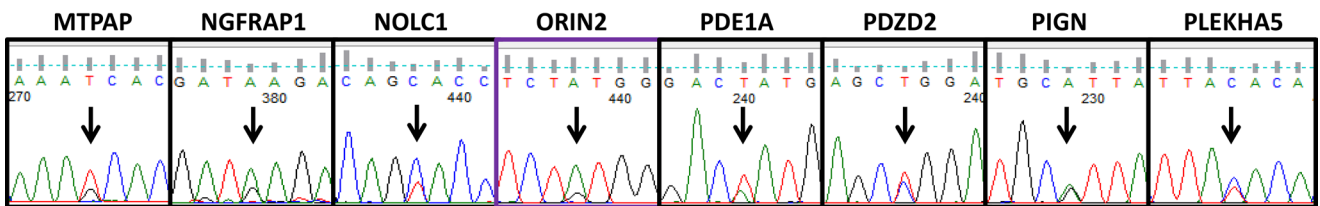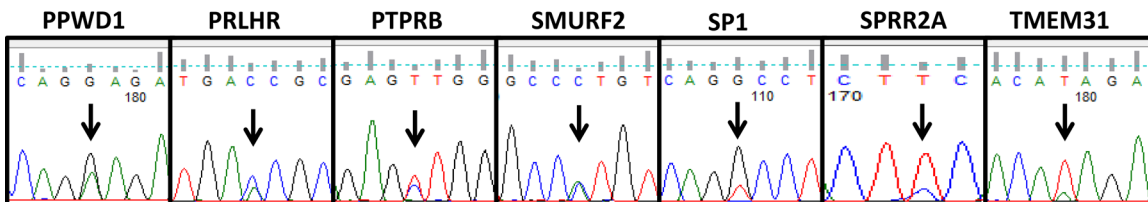

**P4T3**

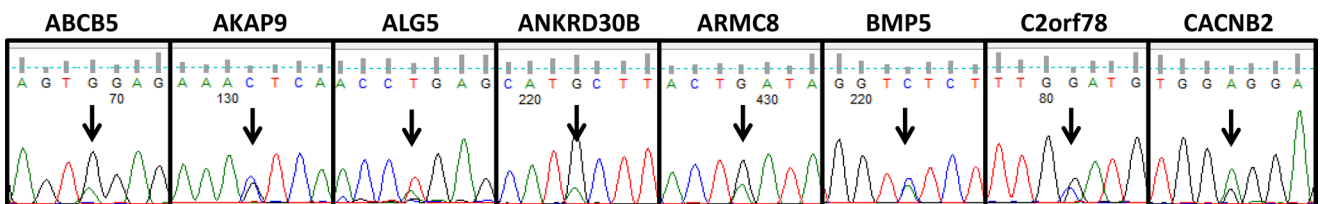

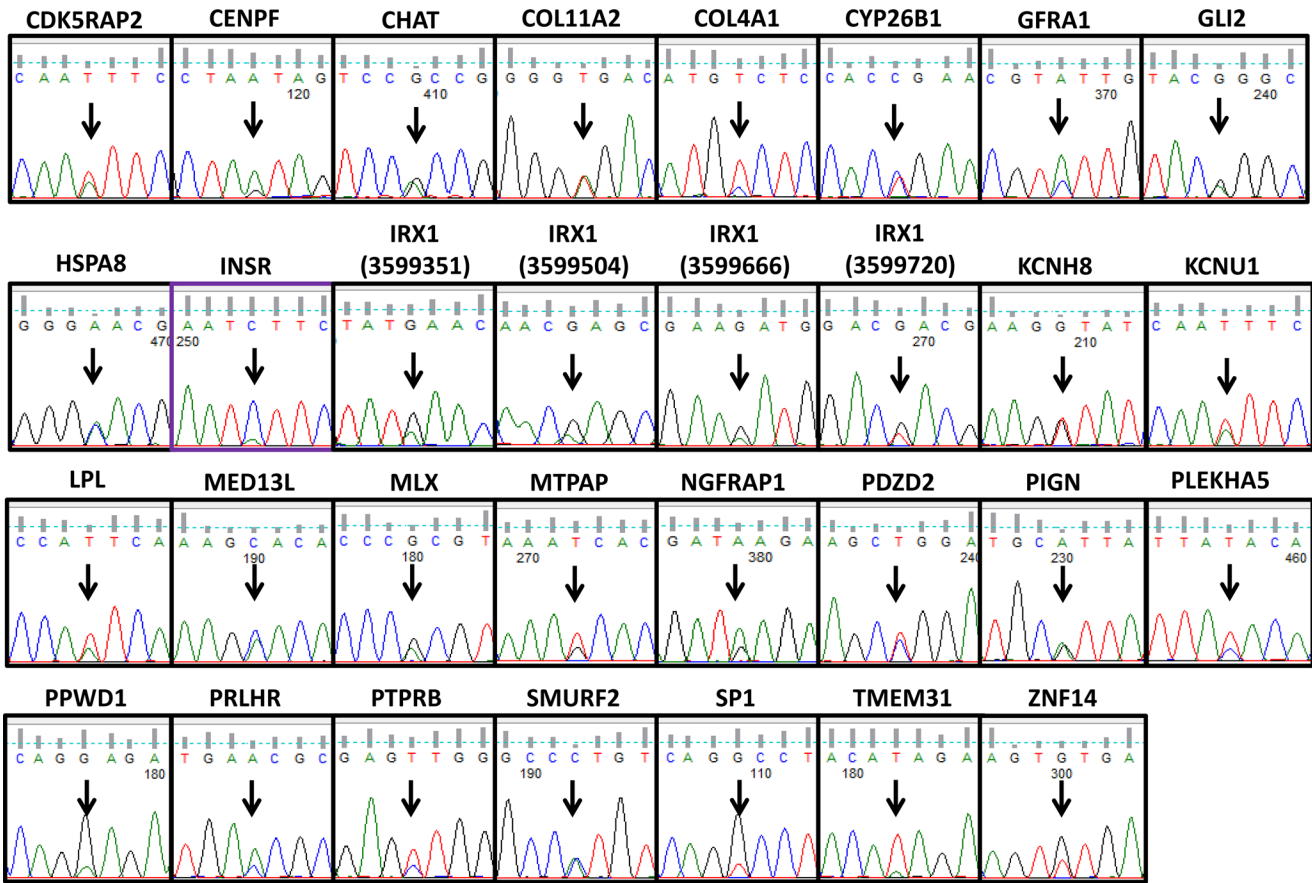

**P4T4**

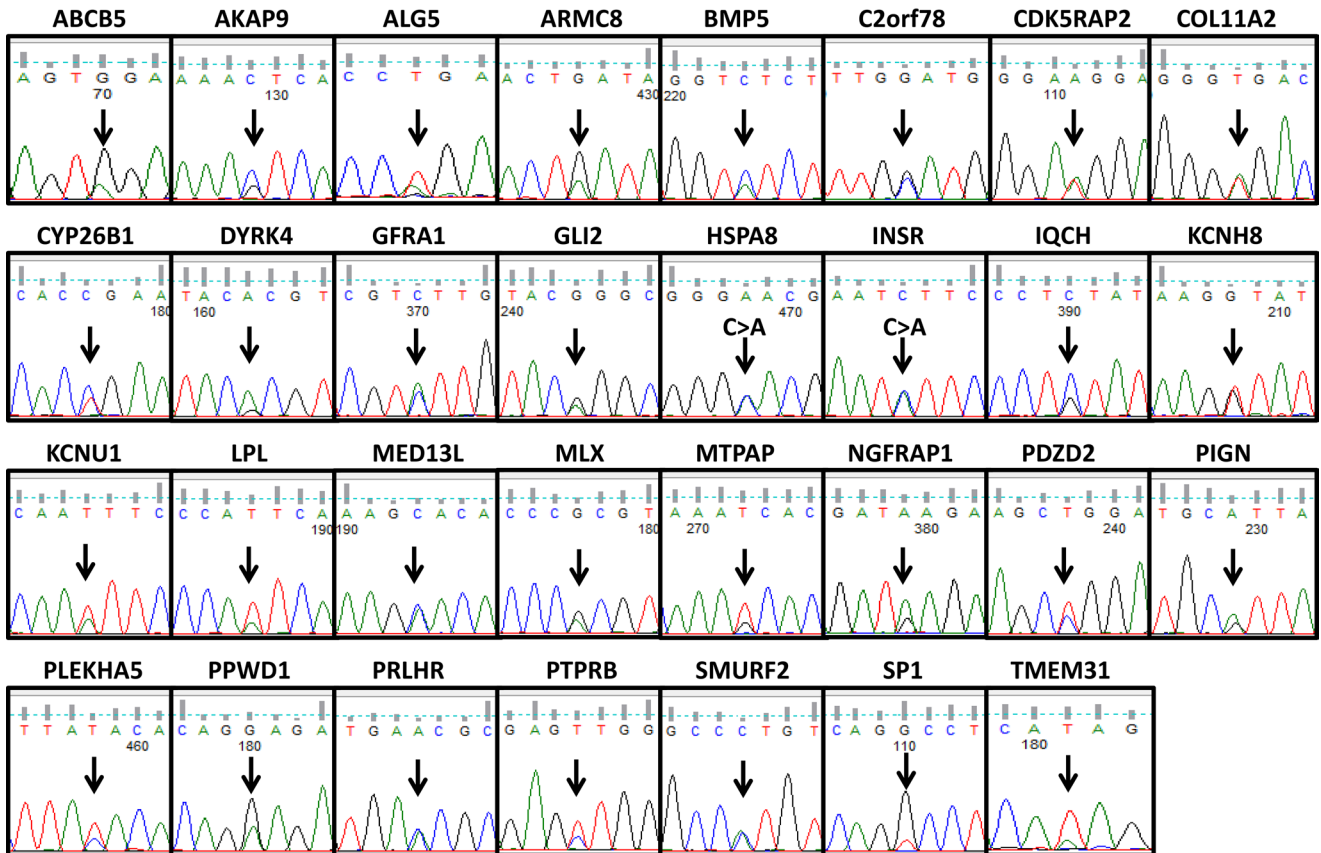

## P4T5

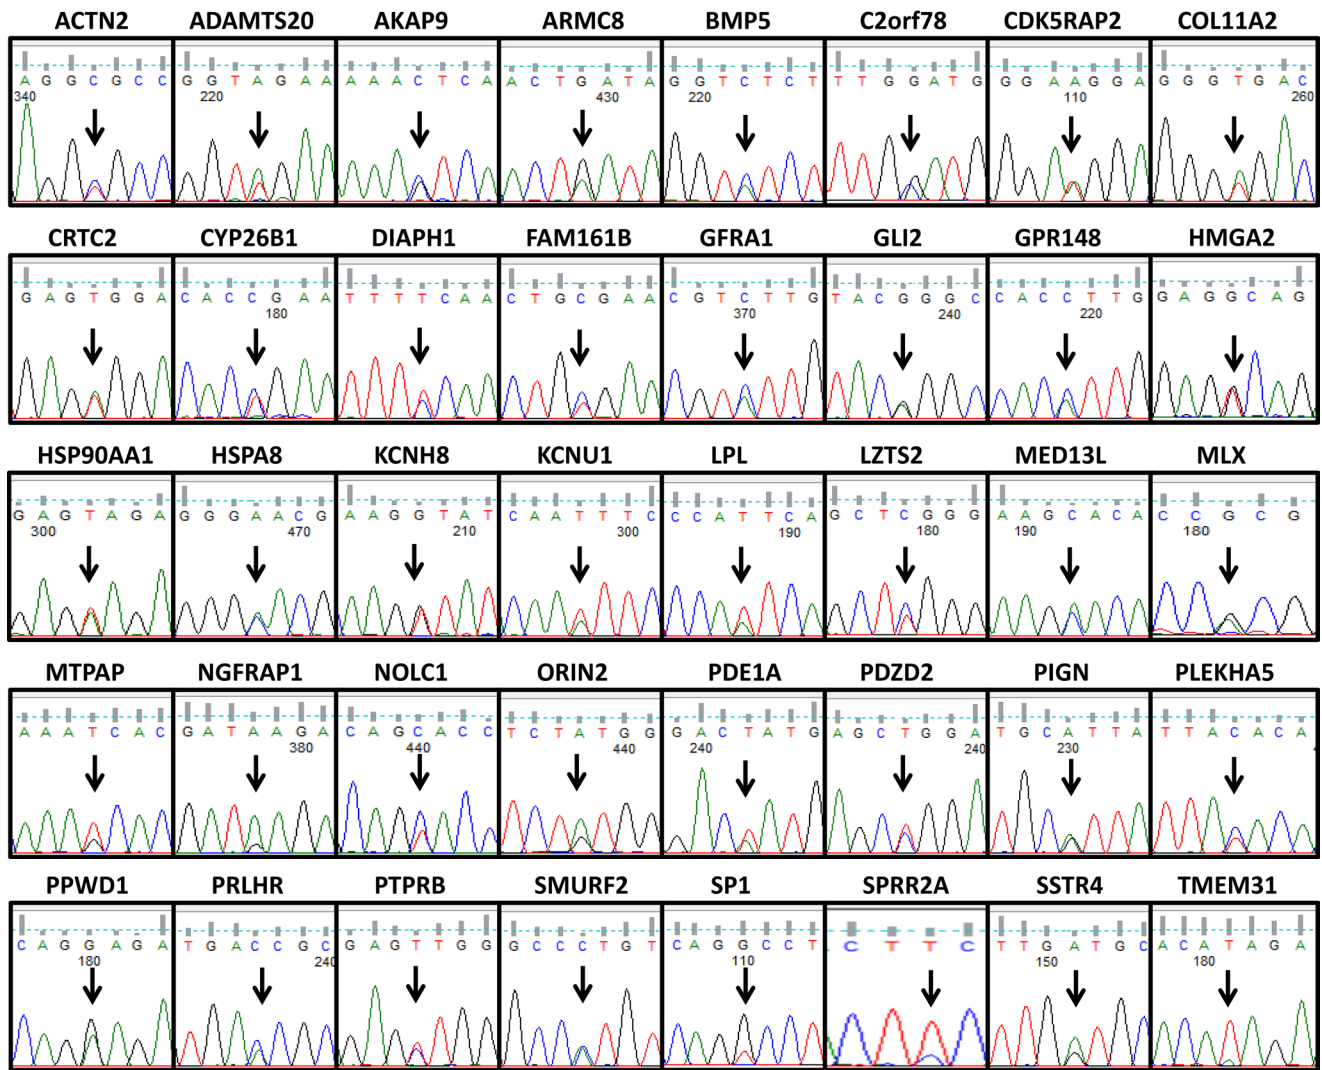

## P5T1

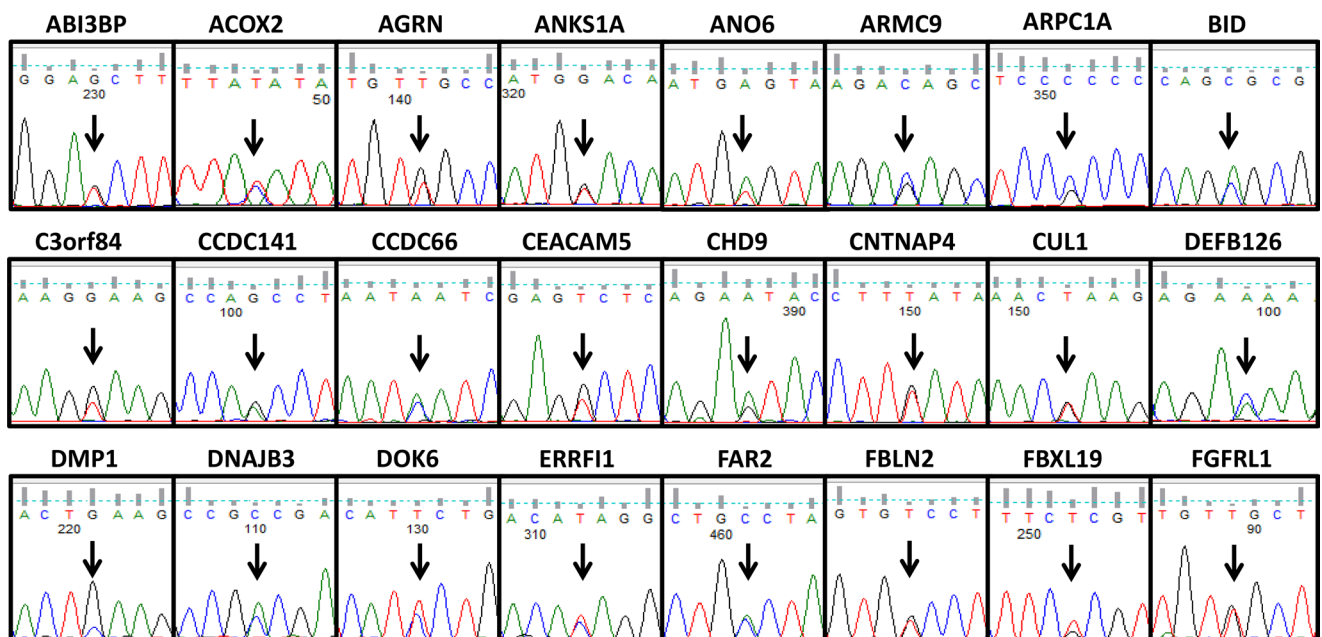

## P4T5

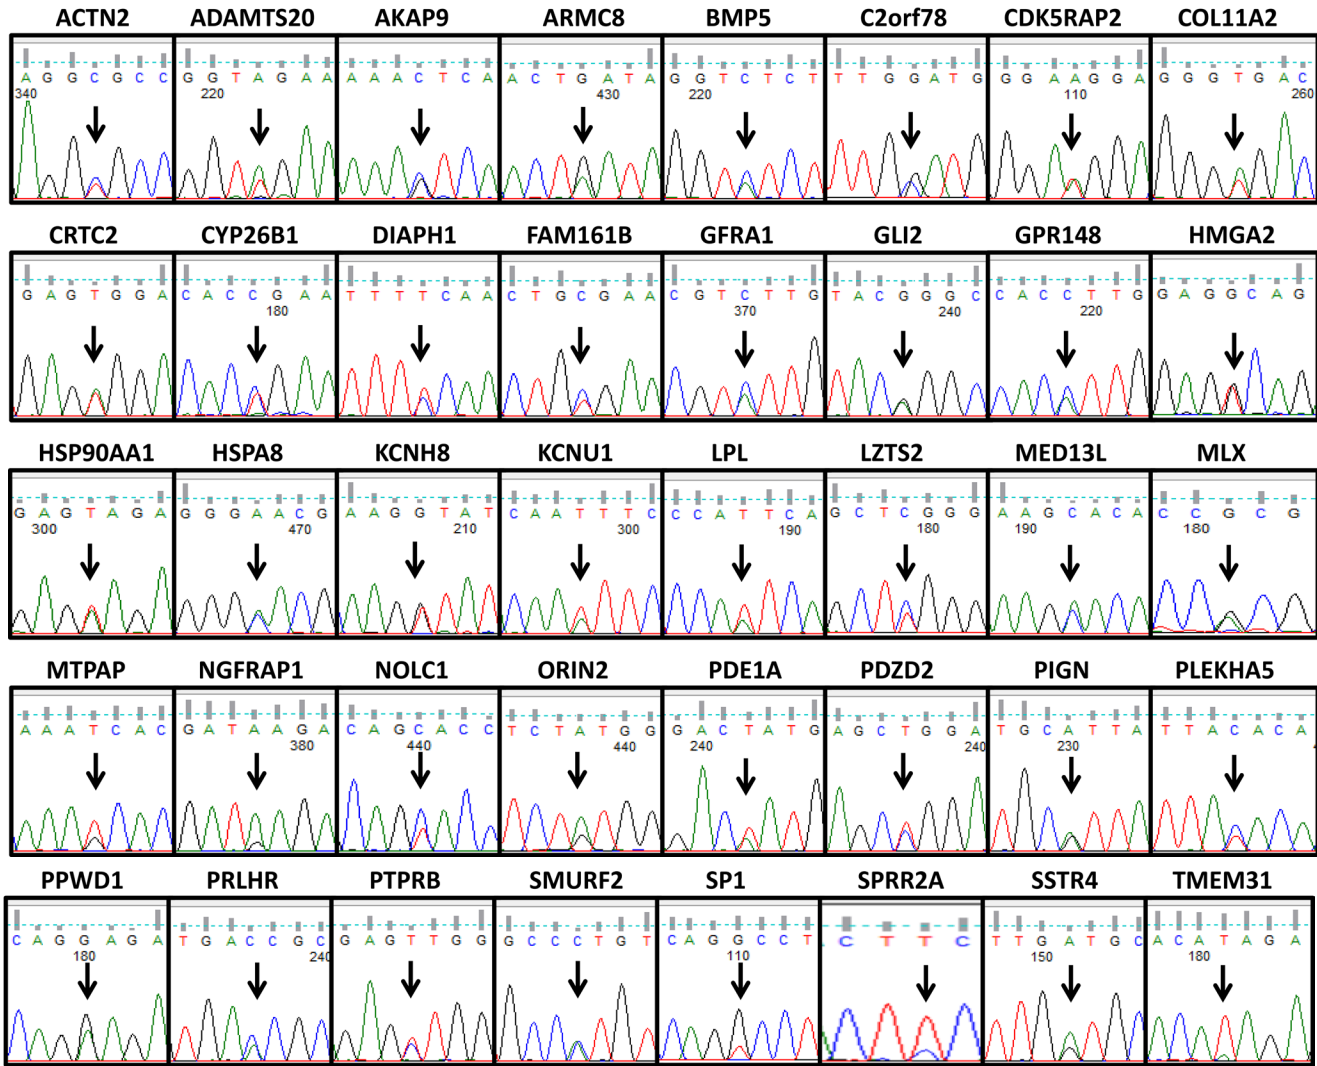

## P5T1

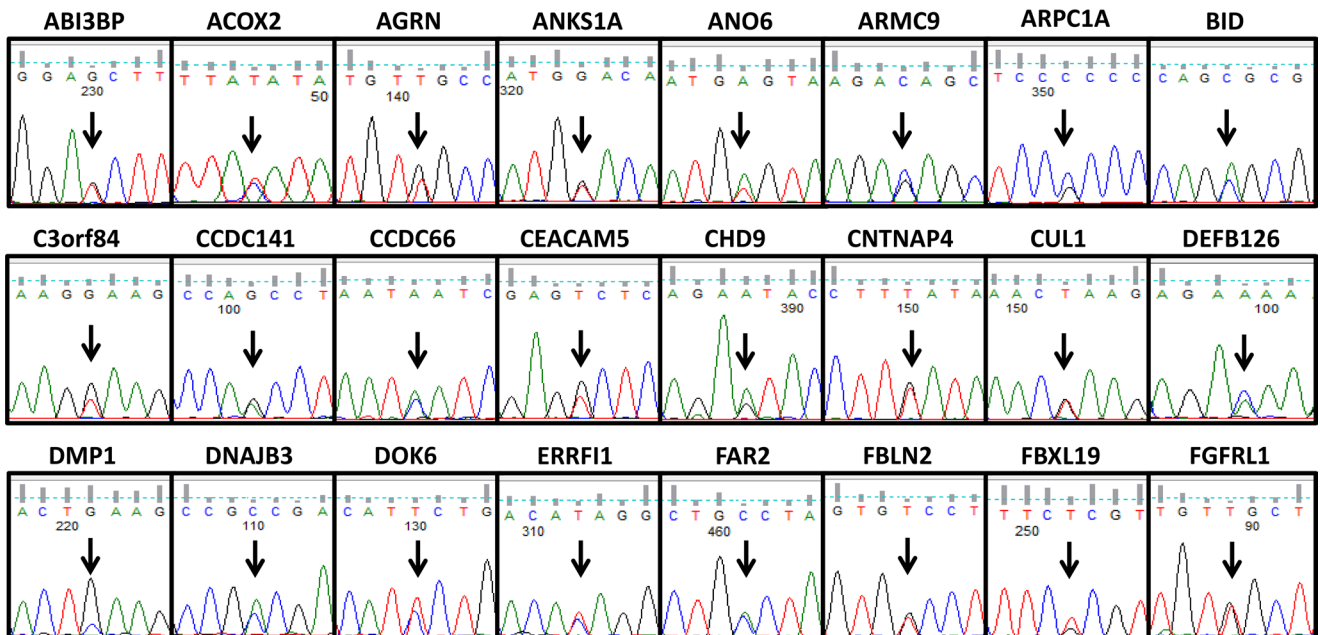



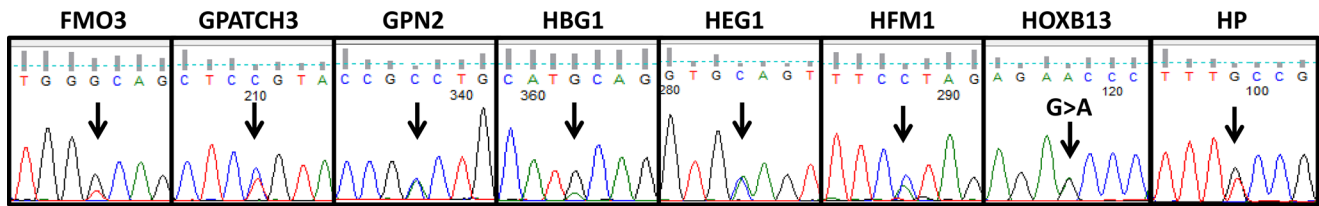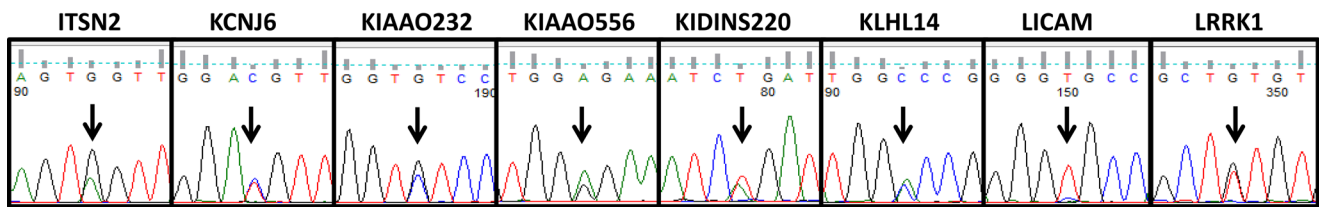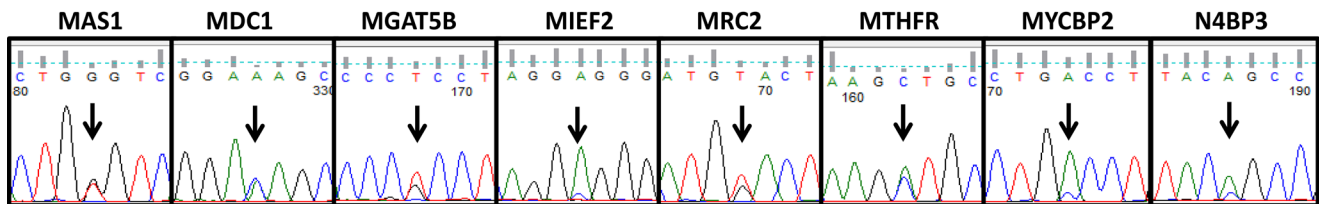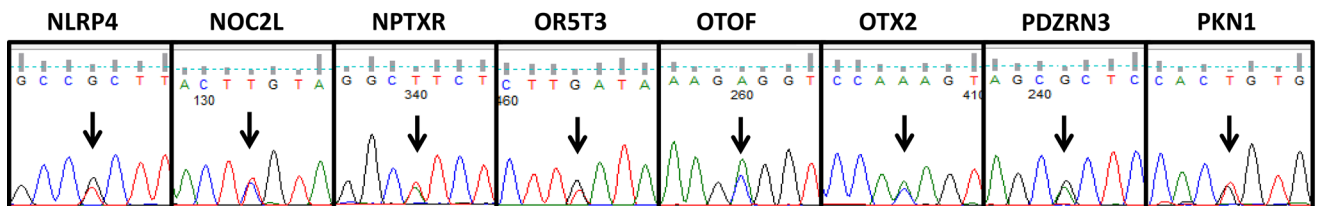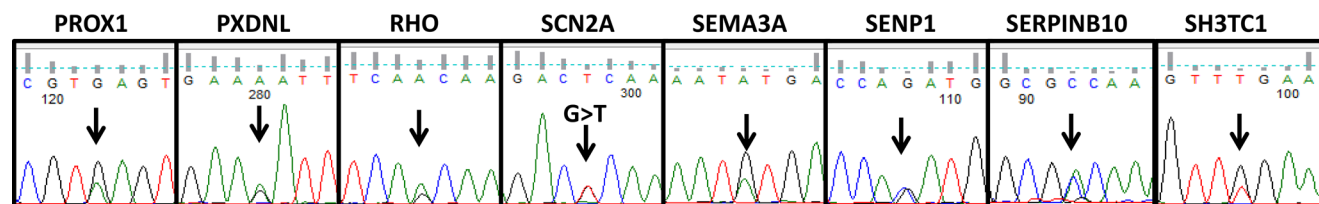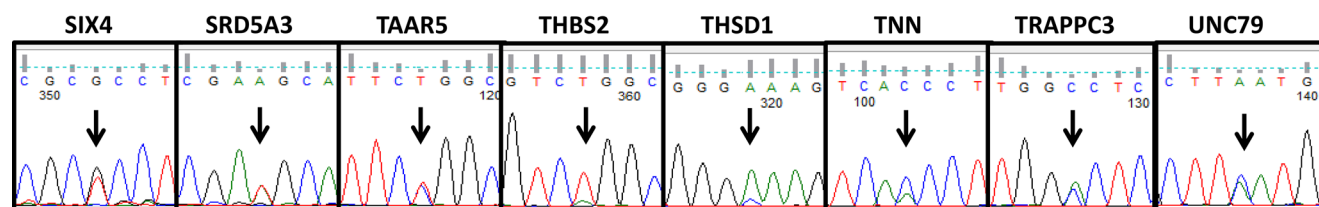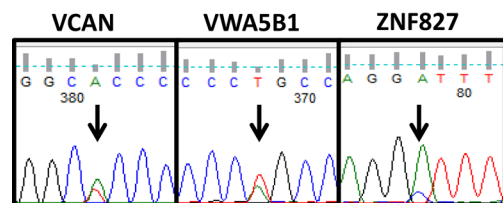

**P5T2**

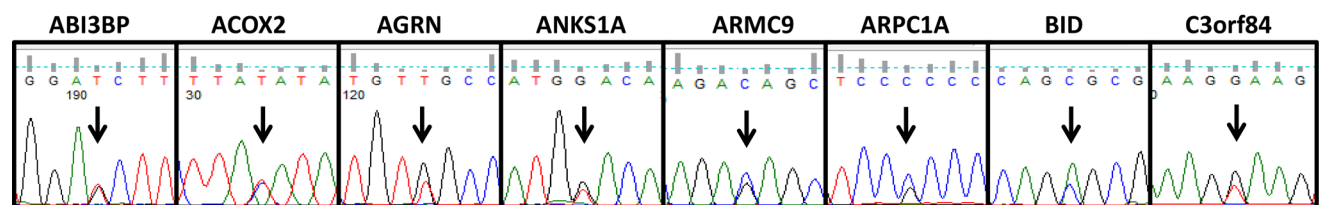



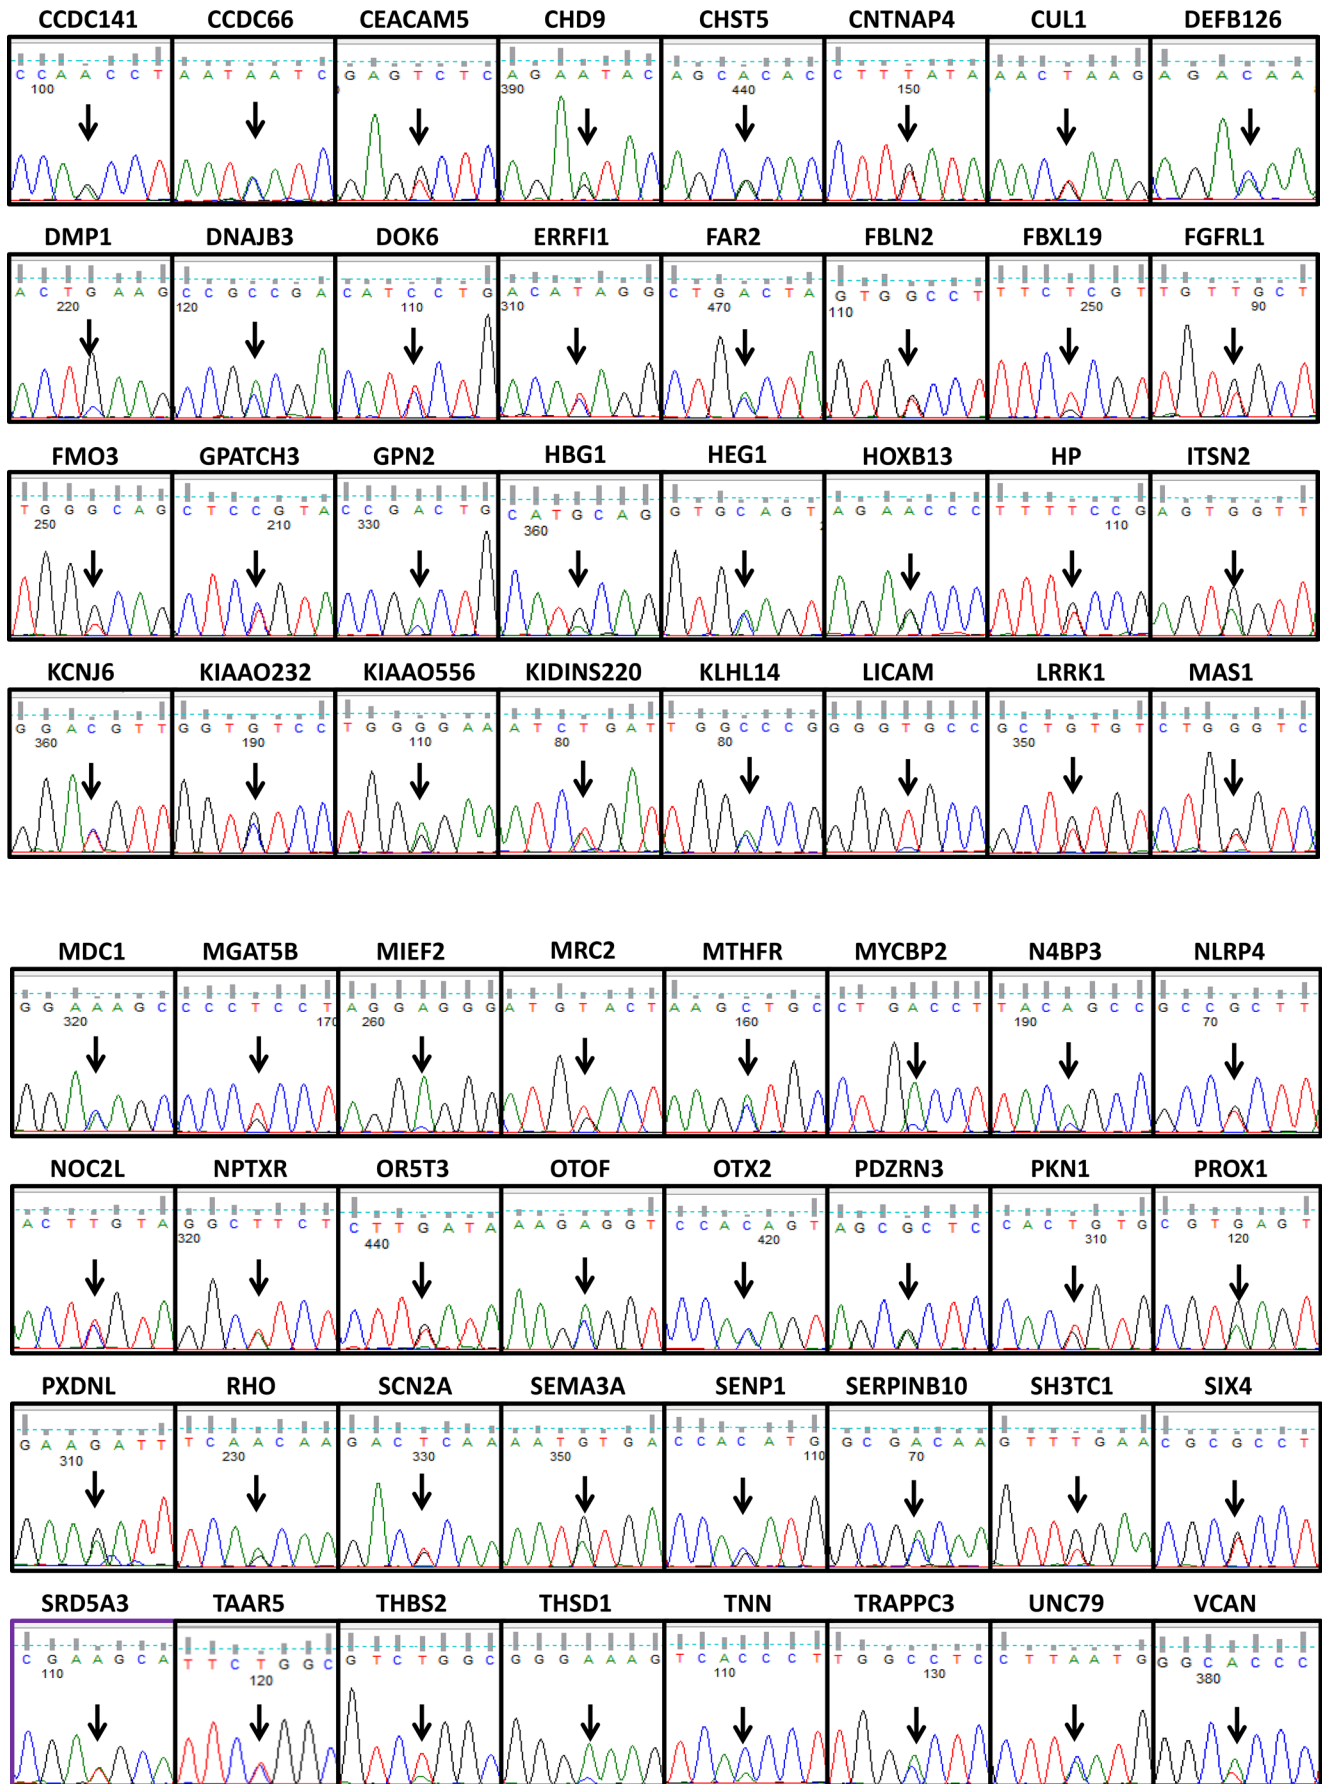

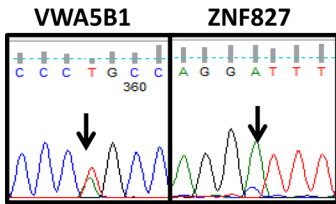

**P5T3**

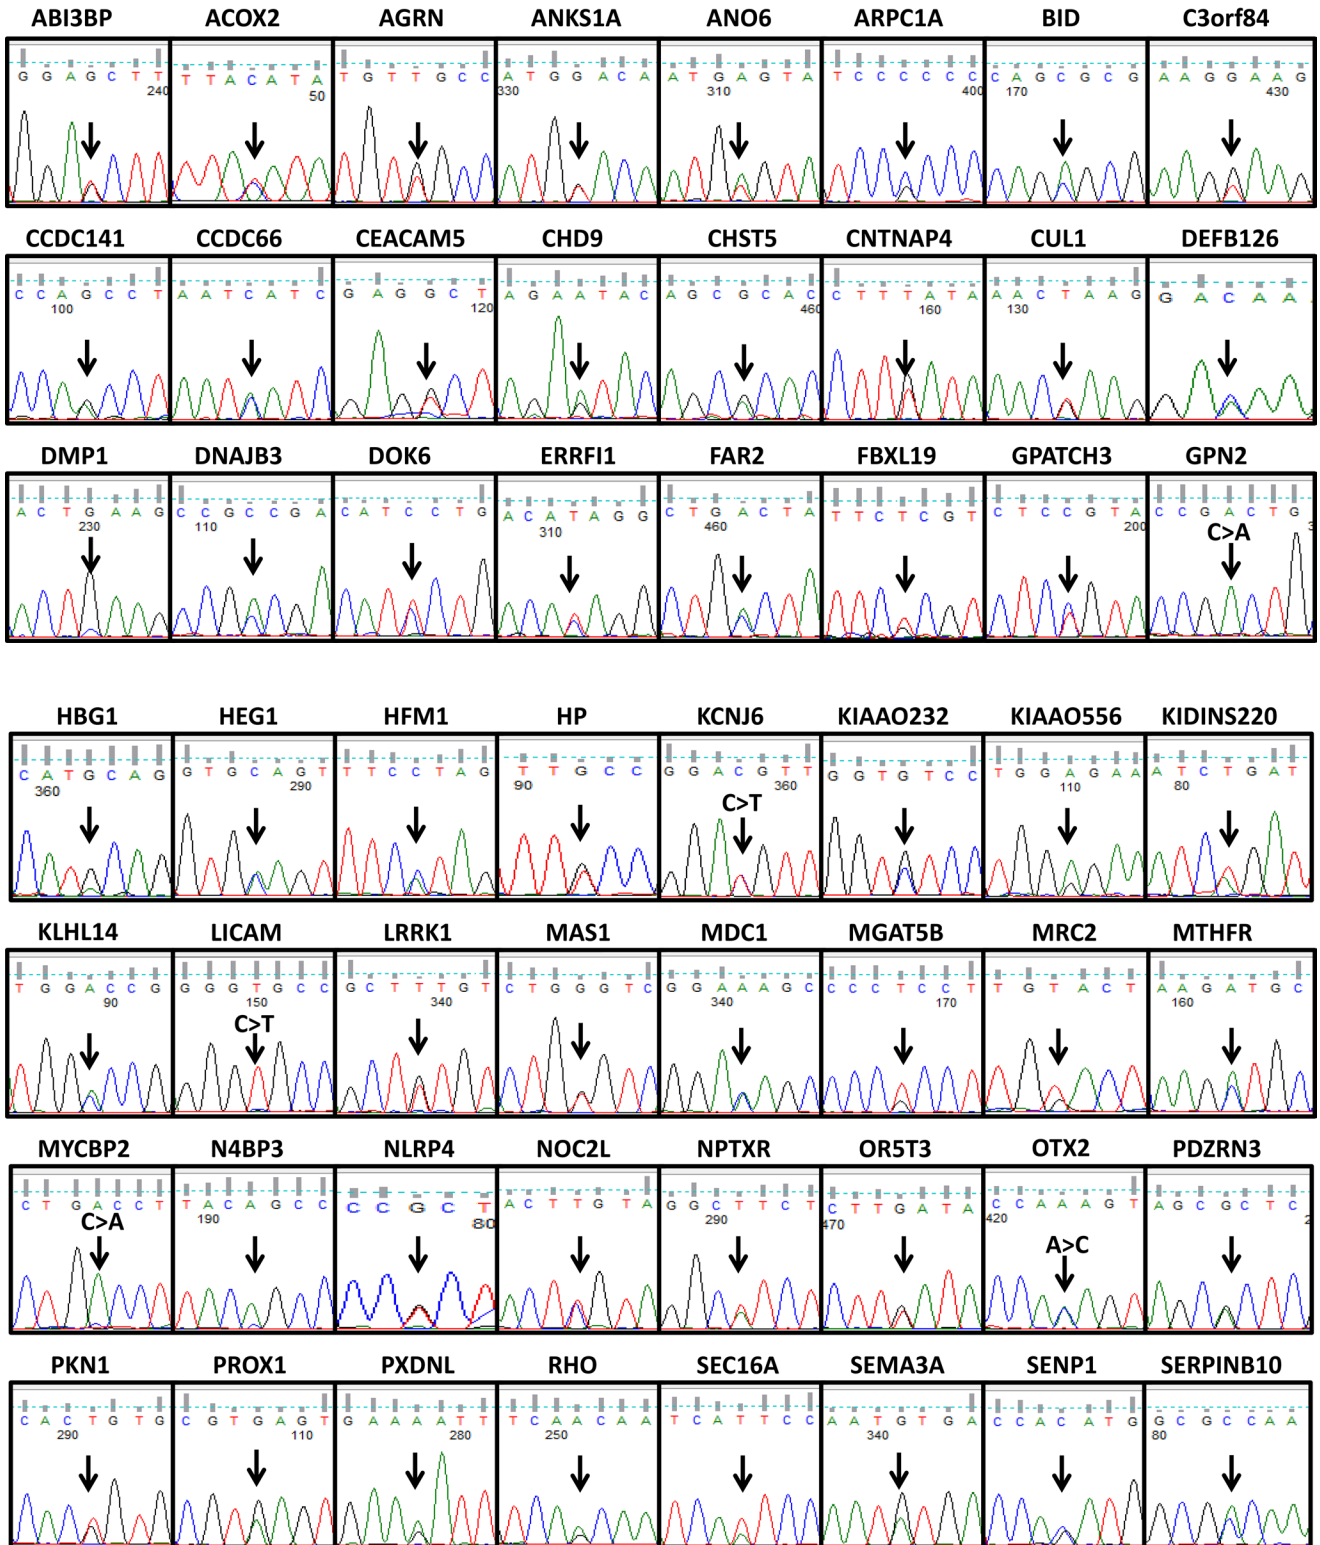

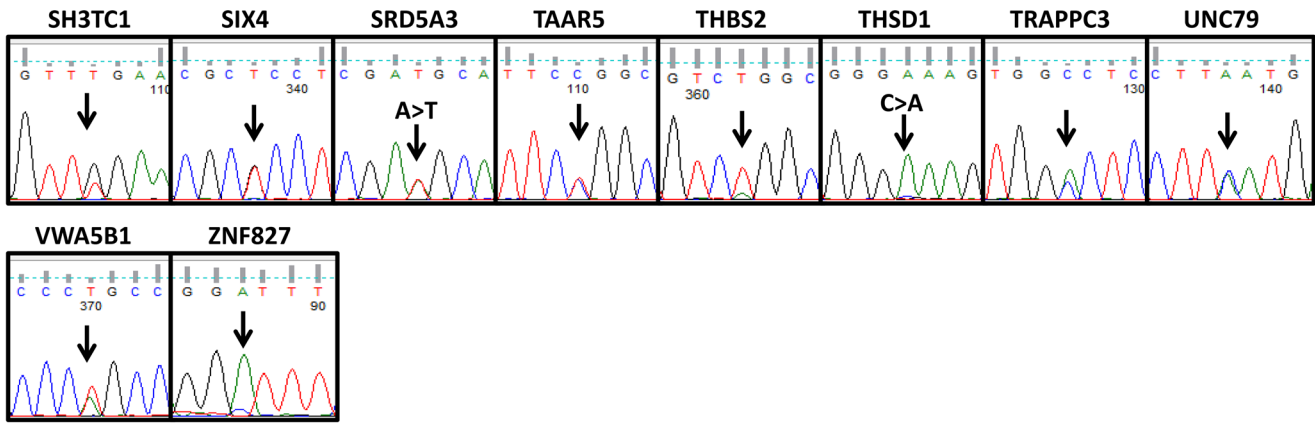

**P5T4**

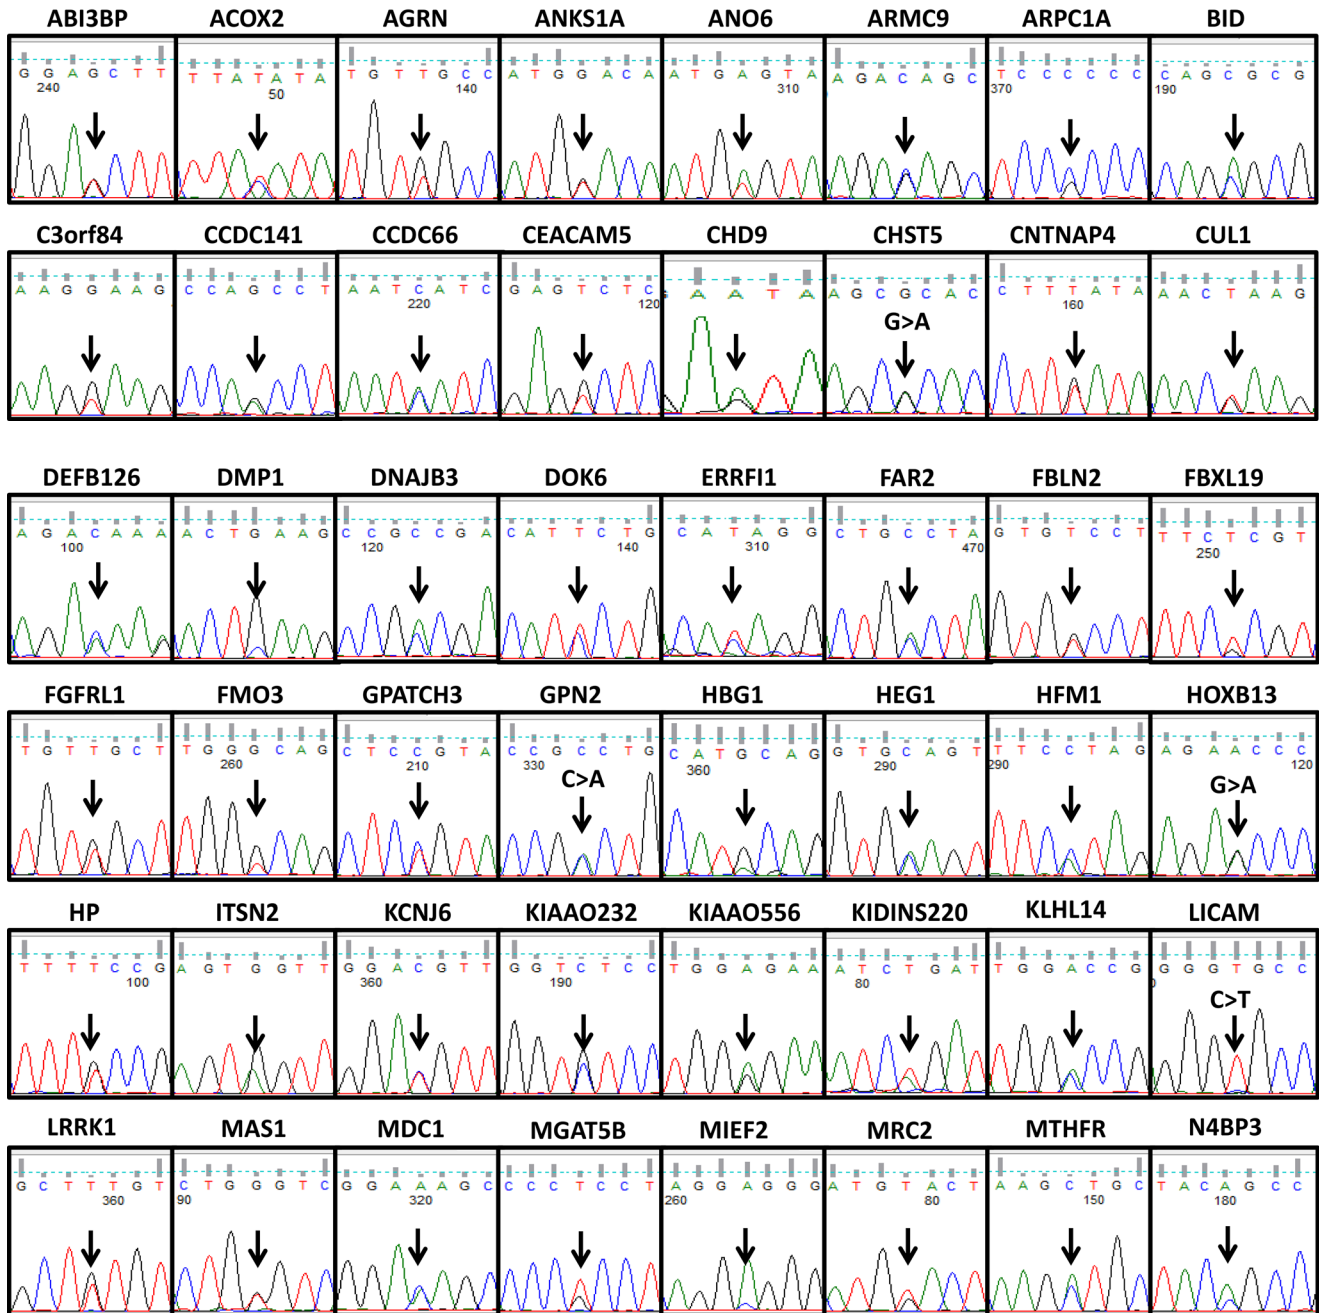

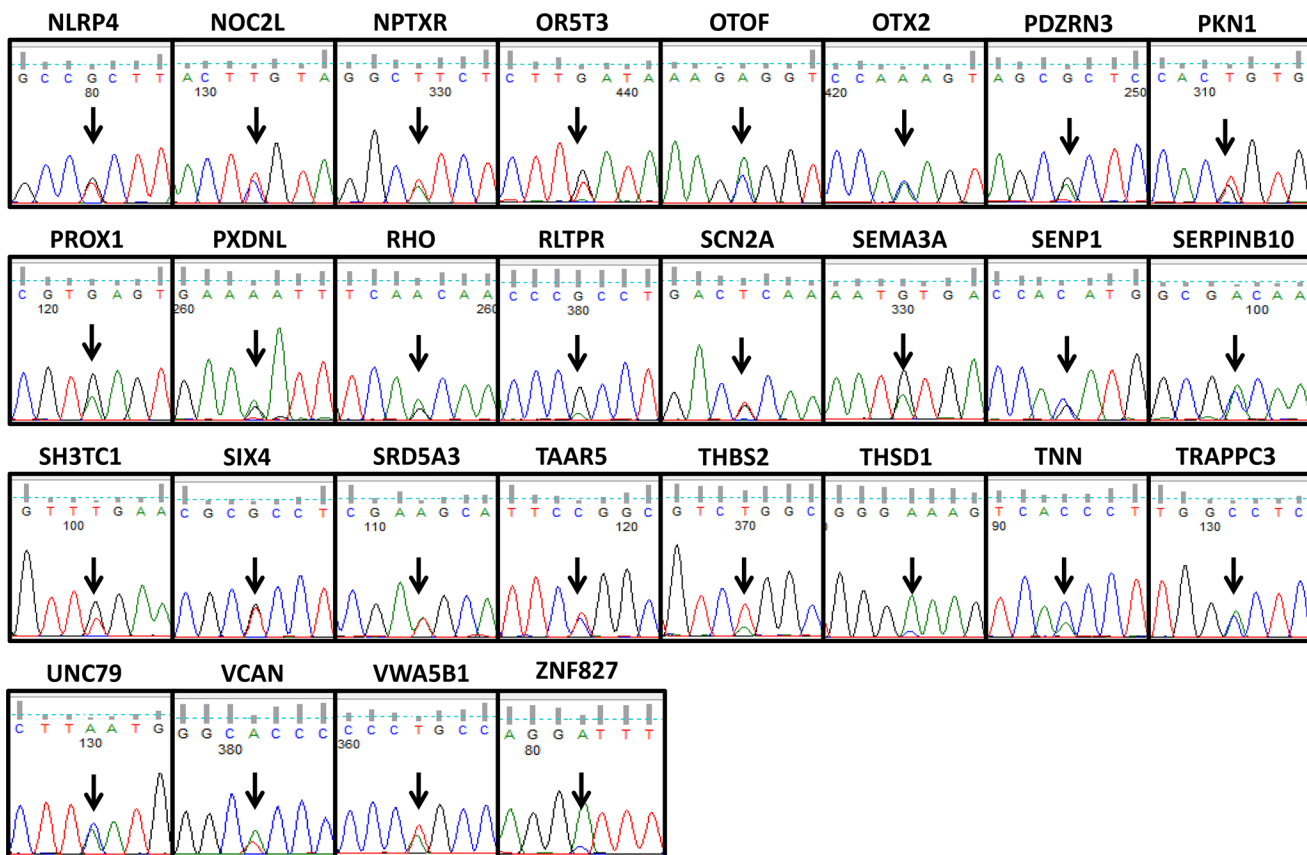

**P5T5**

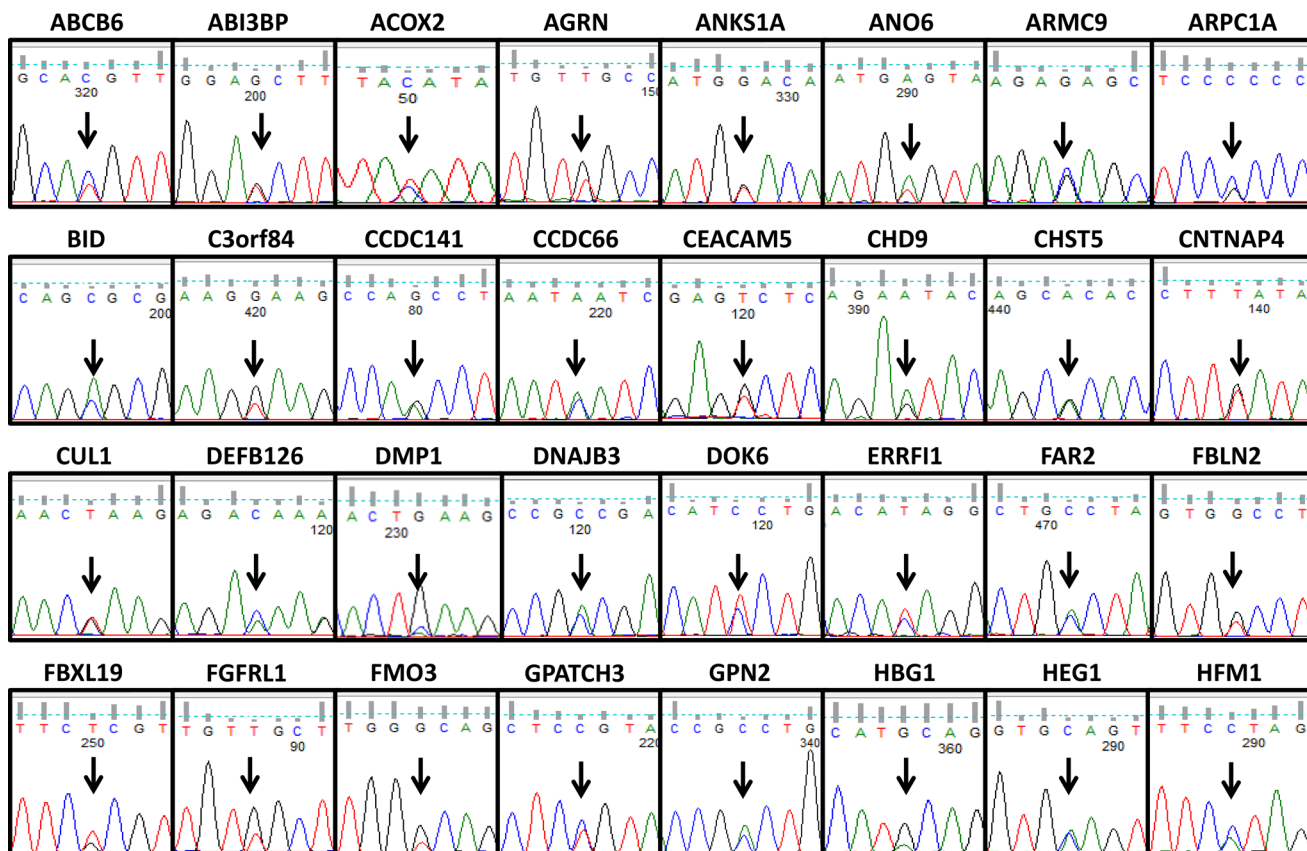

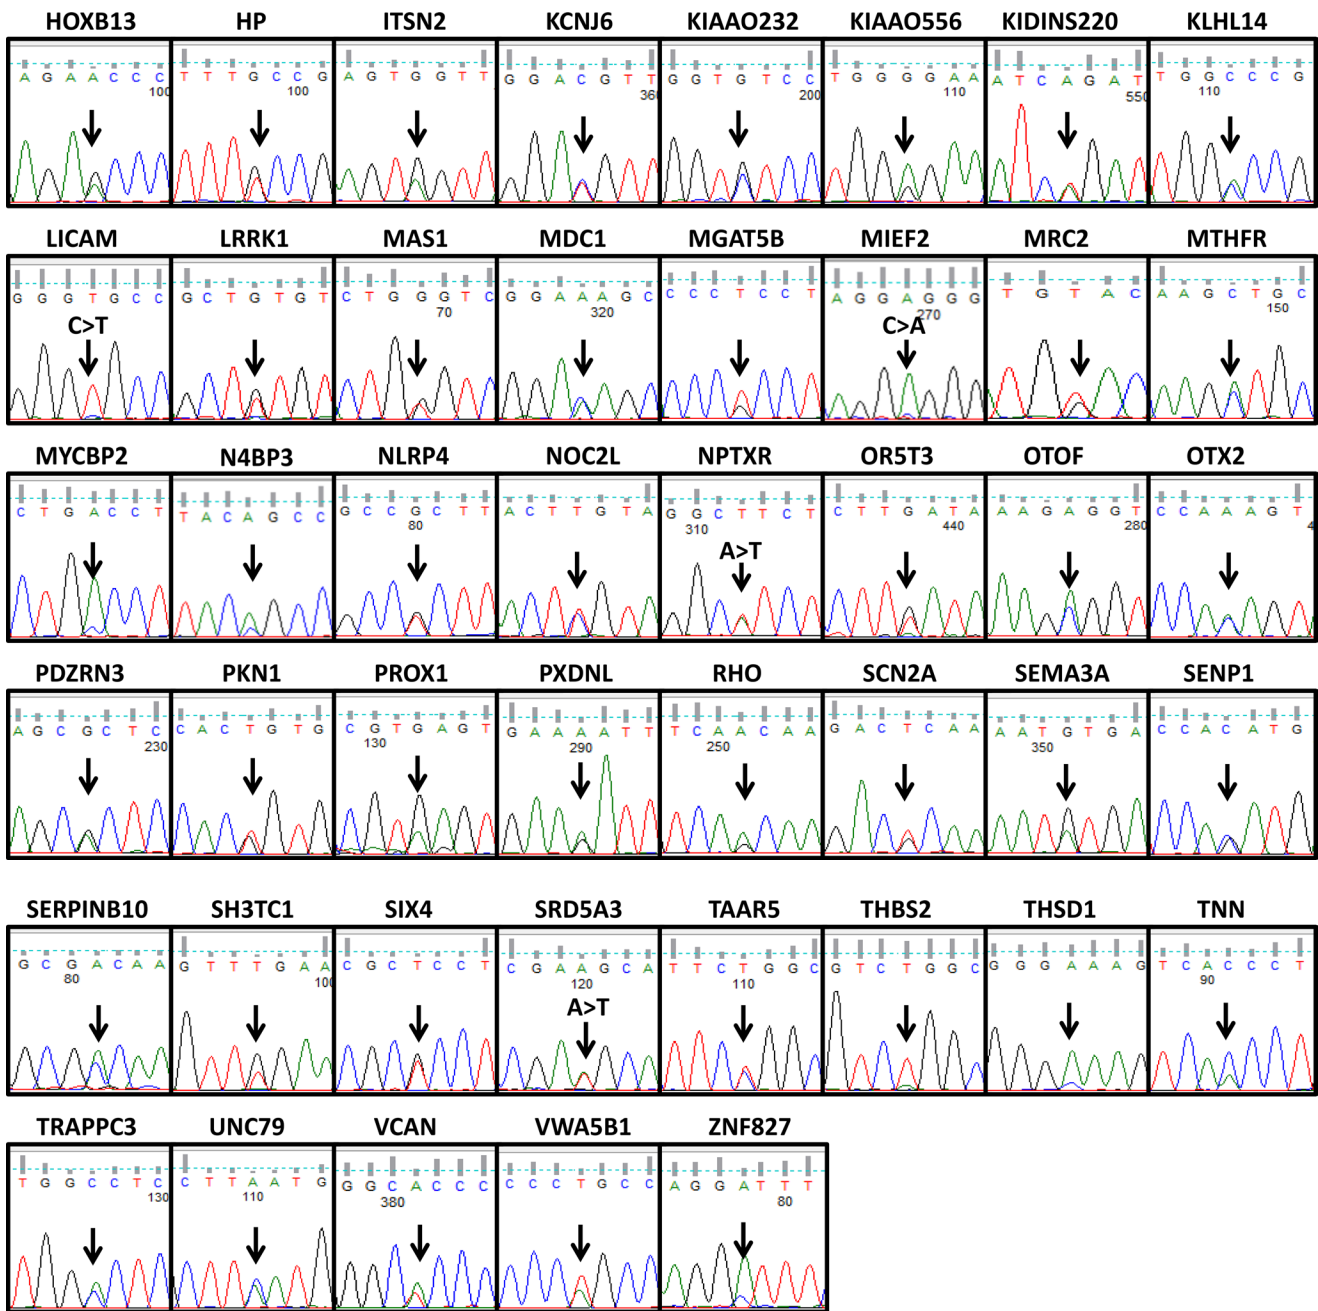

**Supplementary Figure 3: Sanger sequencing validation of mutations identified by whole-exome sequencing in five regions of each tumor.** Mutations are indicated with an arrow. The color of the border indicates whether the mutations were identified by NGS, black imply mutation was identified by NGS and Sanger sequencing, purple imply mutation was identified by Sanger sequencing, but not NGS. Sample names in the form of patient identification and lesion site, such as P1T1 represent tumor region 1 of patient 1.



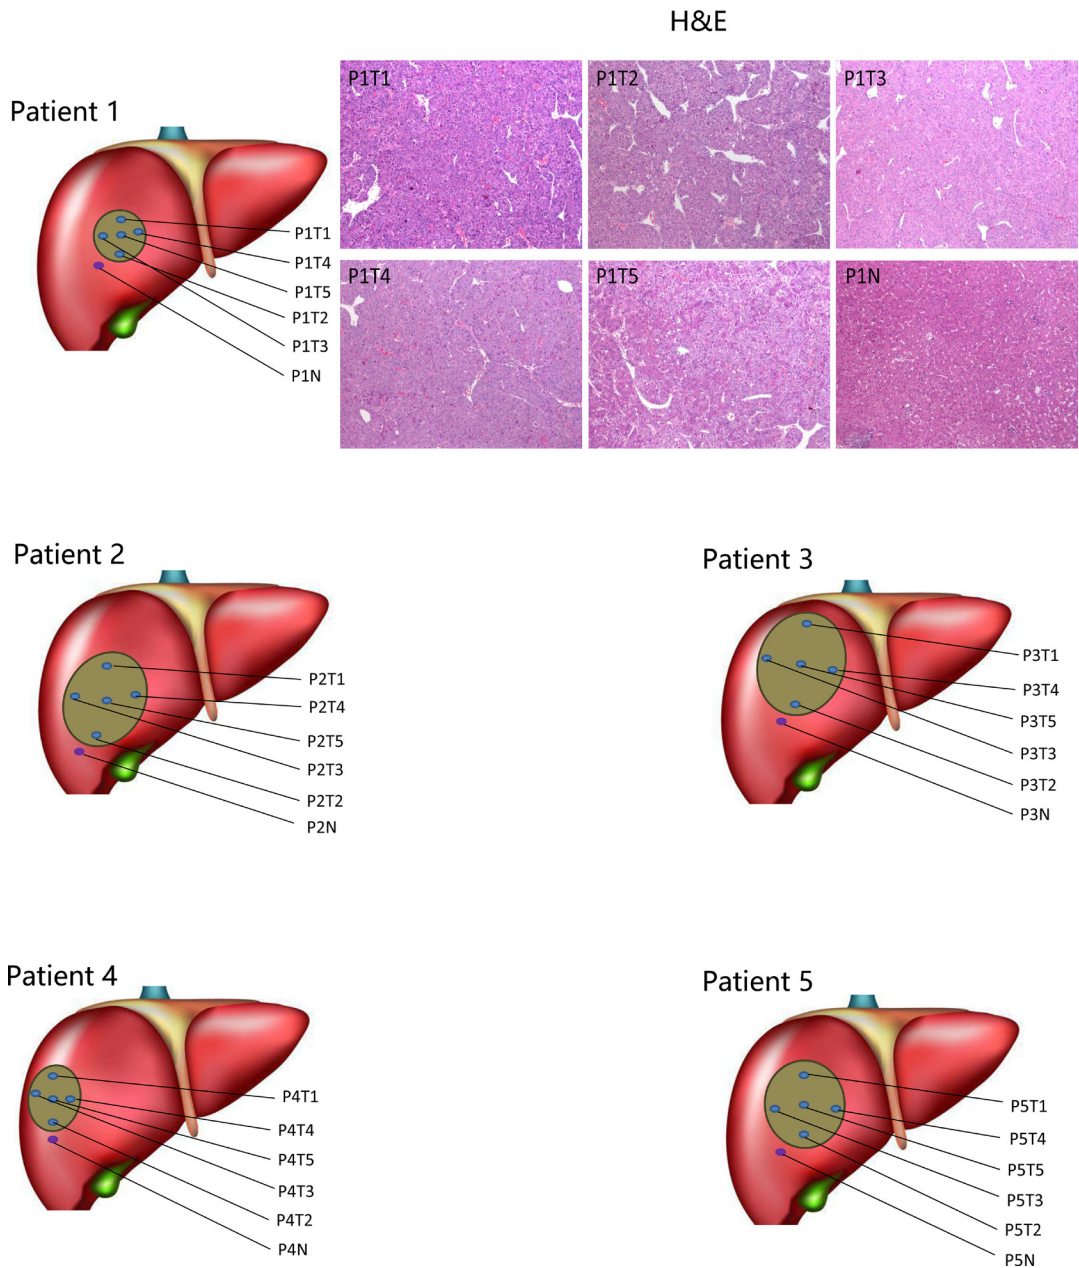

**Supplementary Figure 4: Schematic of spatial distribution of five tumor regions in five PLC patients.** The brown circle on behalf of the lesions, and the position of blue circles represent spatial distribution of five tumor specimens from the same tumor, adjacent normal tissues are indicated in purple. Sample names are marked on the right. HE staining of samples from patient 1 ( $\times 10$ ) shown in the upper right.



**Supplementary Table 1: TCR $\beta$  CDR3 sequencing metrics in five PLC patients**

| Patient   | Region    | Productive TCR $\beta$ reads | Unique TCR $\beta$ reads | Highest frequency clones (%) | Top 250 clones (%) | ShannonDI |         |
|-----------|-----------|------------------------------|--------------------------|------------------------------|--------------------|-----------|---------|
| Patient 1 | T1        | 5360036                      | 987605                   | 3.86                         | 29.13              | 27406.56  |         |
|           | T2        | 4392858                      | 403867                   | 2.17                         | 38.51              | 7616.34   |         |
|           | T3        | 5167306                      | 715877                   | 4.21                         | 33.14              | 14638.81  |         |
|           | T4        | 4662092                      | 416706                   | 2.03                         | 35.86              | 8544.04   |         |
|           | T5        | 4096513                      | 412691                   | 3.14                         | 40.93              | 7187.40   |         |
|           | N         | 3935084                      | 332686                   | 7.96                         | 49.06              | 2879.83   |         |
|           | B         | 4141342                      | 840685                   | 2.52                         | 19.81              | 57176.64  |         |
|           | Patient 2 | T1                           | 3651721                  | 518939                       | 0.98               | 30.95     | 18096   |
| T2        |           | 5458844                      | 664799                   | 1.56                         | 32.15              | 15372.41  |         |
| T3        |           | 5874530                      | 711594                   | 1.26                         | 29.16              | 19349.52  |         |
| T4        |           | 5780239                      | 592861                   | 1.9                          | 35.51              | 11369.95  |         |
| T5        |           | 4721377                      | 608839                   | 0.99                         | 30.78              | 17516.28  |         |
| N         |           | 5437841                      | 751031                   | 1.64                         | 24.90              | 24790.03  |         |
| B         |           | 4774968                      | 806320                   | 1.81                         | 21.72              | 38342.37  |         |
| Patient 3 |           | T1                           | 5791071                  | 280919                       | 6.89               | 63.24     | 1278.49 |
|           | T2        | 5721249                      | 286599                   | 4.79                         | 61.1               | 1534.50   |         |
|           | T3        | 4506728                      | 292206                   | 7.43                         | 56.47              | 2281.84   |         |
|           | T4        | 5802227                      | 281650                   | 7.37                         | 62.43              | 1312.64   |         |
|           | T5        | 5818104                      | 307188                   | 5.05                         | 57.78              | 2011.46   |         |
|           | N         | 5544156                      | 380251                   | 9.0                          | 54.77              | 2215.72   |         |
|           | B         | 4260951                      | 831968                   | 6.51                         | 24.86              | 37514.41  |         |
|           | Patient 4 | T1                           | 5916386                  | 613842                       | 4.28               | 37.37     | 9356.73 |
| T2        |           | 4874918                      | 431783                   | 3.79                         | 46.51              | 4786.17   |         |
| T3        |           | 3895671                      | 370977                   | 3.62                         | 43.99              | 5218.94   |         |
| T4        |           | 5780239                      | 584445                   | 8.28                         | 43.34              | 5233.54   |         |
| T5        |           | 5203030                      | 400495                   | 6.09                         | 48.96              | 3541.83   |         |
| T1_RE     |           | 4999086                      | 804699                   | 3.28                         | 31.31              | 9632.66   |         |
| T2_RE     |           | 4140723                      | 591676                   | 4.10                         | 39.03              | 4917.59   |         |
| T3_RE     |           | 4339141                      | 666721                   | 2.62                         | 34.67              | 6011.33   |         |
| T4_RE     |           | 5378560                      | 797385                   | 7.42                         | 37.48              | 6192.03   |         |
| T5_RE     |           | 4515047                      | 592156                   | 4.70                         | 40.72              | 4494.97   |         |
| N         |           | 4795596                      | 507332                   | 8.27                         | 43.15              | 6010.56   |         |
| B         |           | 5998093                      | 474193                   | 45.53                        | 71.31              | 234.52    |         |
| Patient 5 |           | T1                           | 4538512                  | 254916                       | 8.64               | 58.68     | 1521.37 |
|           |           | T2                           | 5578762                  | 379031                       | 22.56              | 61.27     | 949.64  |
|           | T3        | 4677002                      | 285741                   | 16.69                        | 59.06              | 1317.05   |         |
|           | T4        | 5526088                      | 429977                   | 7.85                         | 51.73              | 2593.43   |         |
|           | T5        | 5057312                      | 320041                   | 7.08                         | 55.39              | 2202.19   |         |
|           | N         | 4382572                      | 465318                   | 7.1                          | 42.40              | 6184.12   |         |
|           | B         | 7131196                      | 1267771                  | 1.91                         | 18.55              | 57895.63  |         |

**Supplementary Table 2: The distribution of TCR $\beta$  clones with different frequency**

| Patient   | Region    | Unique TCRB reads (n) |               |             |           |        |      |
|-----------|-----------|-----------------------|---------------|-------------|-----------|--------|------|
|           |           | < 0.0001%             | 0.0001–0.001% | 0.001–0.01% | 0.01–0.1% | 0.1–1% | > 1% |
| Patient 1 | T1        | 92348                 | 54922         | 8250        | 928       | 56     | 1    |
|           | T2        | 353327                | 43598         | 5585        | 1263      | 92     | 3    |
|           | T3        | 660022                | 47820         | 7006        | 963       | 62     | 4    |
|           | T4        | 354469                | 56554         | 4165        | 1405      | 110    | 2    |
|           | T5        | 365603                | 40223         | 5659        | 1099      | 101    | 5    |
|           | N         | 282919                | 44087         | 4466        | 1146      | 58     | 6    |
|           | B         | 754882                | 74349         | 10752       | 669       | 32     | 1    |
|           | Patient 2 | T1                    | 451880        | 58714       | 7281      | 984    | 80   |
| T2        | 603907    | 52826                 | 6644          | 1340        | 79        | 3      |      |
| T3        | 645580    | 57626                 | 7168          | 1133        | 86        | 1      |      |
| T4        | 534404    | 49434                 | 7704          | 1214        | 101       | 4      |      |
| T5        | 544798    | 54751                 | 7956          | 1254        | 80        | 0      |      |
| N         | 684390    | 56252                 | 8781          | 1544        | 63        | 1      |      |
| B         | 729994    | 65396                 | 9884          | 1002        | 43        | 1      |      |
| Patient 3 | T1        | 248008                | 27512         | 4555        | 744       | 88     | 12   |
|           | T2        | 250548                | 30679         | 4520        | 724       | 99     | 11   |
|           | T3        | 251348                | 34939         | 4969        | 830       | 111    | 9    |
|           | T4        | 247193                | 29341         | 4212        | 801       | 90     | 13   |
|           | T5        | 267054                | 34784         | 4315        | 903       | 120    | 10   |
|           | N         | 341843                | 31999         | 5544        | 781       | 75     | 9    |
|           | B         | 743387                | 76398         | 11594       | 560       | 25     | 4    |
|           | Patient 4 | T1                    | 557998        | 46921       | 7583      | 1260   | 75   |
| T2        | 383495    | 40549                 | 6708          | 938         | 86        | 7      |      |
| T3        | 316280    | 47687                 | 5977          | 942         | 81        | 10     |      |
| T4        | 540664    | 36203                 | 6348          | 1156        | 67        | 7      |      |
| T5        | 361007    | 32133                 | 6265          | 1002        | 80        | 8      |      |
| T1_RE     | 737552    | 57707                 | 8307          | 1066        | 62        | 5      |      |
| T2_RE     | 539613    | 43855                 | 7193          | 934         | 76        | 5      |      |
| T3_RE     | 606530    | 52771                 | 6371          | 983         | 61        | 5      |      |
| T4_RE     | 740588    | 49616                 | 6103          | 1018        | 54        | 6      |      |
| T5_RE     | 538252    | 45968                 | 6863          | 998         | 68        | 7      |      |
| N         | 455048    | 44726                 | 6622          | 865         | 67        | 4      |      |
| B         | 438425    | 31298                 | 4113          | 299         | 56        | 2      |      |
| Patient 5 | T1        | 216861                | 33048         | 3940        | 954       | 104    | 9    |
|           | T2        | 341425                | 32382         | 4413        | 723       | 82     | 6    |
|           | T3        | 245995                | 34909         | 3797        | 940       | 93     | 7    |
|           | T4        | 384494                | 39659         | 4915        | 830       | 72     | 7    |
|           | T5        | 283815                | 30732         | 4562        | 825       | 95     | 9    |
|           | N         | 415023                | 42159         | 7090        | 927       | 70     | 4    |
|           | B         | 1191750               | 64476         | 10811       | 737       | 43     | 1    |

**Supplementary Table 3: comparison of duplicate samples of each tumor region from patient 4**

| Sample ID <sup>a</sup> | The most expensive clones | Common T cell clones of the duplicate samples (%) | R         | P       |
|------------------------|---------------------------|---------------------------------------------------|-----------|---------|
| P4T1 vs P4T1_RE        | 100                       | 88 (88.0)                                         | 0.986     | 2.2e-16 |
|                        | 250                       | 222 (88.8)                                        | 0.987     | 2.2e-16 |
|                        | 500                       | 442 (88.4)                                        | 0.988     | 2.2e-16 |
|                        | 1000                      | 864 (86.4)                                        | 0.988     | 2.2e-16 |
|                        | 2500                      | 2330 (93.2)                                       | 0.988     | 2.2e-16 |
|                        | 5000                      | 4515 (90.3)                                       | 0.989     | 2.2e-16 |
|                        | 7500                      | 6652 (88.7)                                       | 0.989     | 2.2e-16 |
|                        | 10000                     | 8974 (89.74)                                      | 0.989     | 2.2e-16 |
|                        | P4T2 vs P4T2_RE           | 100                                               | 95 (95.0) | 0.981   |
| 250                    |                           | 230 (92.0)                                        | 0.983     | 2.2e-16 |
| 500                    |                           | 446 (89.2)                                        | 0.984     | 2.2e-16 |
| 1000                   |                           | 921 (92.1)                                        | 0.985     | 2.2e-16 |
| 2500                   |                           | 2253 (90.1)                                       | 0.985     | 2.2e-16 |
| 5000                   |                           | 4421 (88.4)                                       | 0.985     | 2.2e-16 |
| 7500                   |                           | 6754 (90.1)                                       | 0.985     | 2.2e-16 |
| 10000                  |                           | 8908 (89.1)                                       | 0.986     | 2.2e-16 |
| P4T3 vs P4T3_RE        |                           | 100                                               | 85 (85.0) | 0.982   |
|                        | 250                       | 221 (88.4)                                        | 0.984     | 2.2e-16 |
|                        | 500                       | 449 (89.8)                                        | 0.985     | 2.2e-16 |
|                        | 1000                      | 916 (91.6)                                        | 0.986     | 2.2e-16 |
|                        | 2500                      | 2222 (88.9)                                       | 0.986     | 2.2e-16 |
|                        | 5000                      | 4482 (89.6)                                       | 0.987     | 2.2e-16 |
|                        | 7500                      | 6623 (88.3)                                       | 0.987     | 2.2e-16 |
|                        | 10000                     | 8459 (84.6)                                       | 0.987     | 2.2e-16 |
|                        | P4T4_1 vs P4T4_2          | 100                                               | 87 (87.0) | 0.999   |
| 250                    |                           | 228 (91.2)                                        | 0.999     | 2.2e-16 |
| 500                    |                           | 455 (91.0)                                        | 0.999     | 2.2e-16 |
| 1000                   |                           | 880 (88.0)                                        | 0.999     | 2.2e-16 |
| 2500                   |                           | 2253 (90.1)                                       | 0.999     | 2.2e-16 |
| 5000                   |                           | 4368 (87.4)                                       | 0.999     | 2.2e-16 |
| 7500                   |                           | 6330 (84.4)                                       | 0.999     | 2.2e-16 |
| 10000                  |                           | 8420 (84.2)                                       | 0.999     | 2.2e-16 |
| P4T5_1 vs P4T5_2       |                           | 100                                               | 93 (93.0) | 0.993   |
|                        | 250                       | 227 (90.8)                                        | 0.994     | 2.2e-16 |
|                        | 500                       | 451 (90.2)                                        | 0.994     | 2.2e-16 |
|                        | 1000                      | 915 (91.5)                                        | 0.994     | 2.2e-16 |
|                        | 2500                      | 2257 (90.28)                                      | 0.994     | 2.2e-16 |
|                        | 5000                      | 4413 (88.3)                                       | 0.994     | 2.2e-16 |
|                        | 7500                      | 6674 (88.9)                                       | 0.994     | 2.2e-16 |
|                        | 10000                     | 8883 (88.8)                                       | 0.994     | 2.2e-16 |

<sup>a</sup>P: patient, T: tumor, RE:duplicated sample, T1 and T1\_RE are duplicate samples of T1, P4T1 represent tumor region 1 of patient 4.

**Supplementary Table 4: Exome-capture sequencing statistics in five PLC patients**

| Sample ID <sup>a</sup> | Total clean reads count | Fraction of uniquely mapped on target | Average sequencing depth on target |
|------------------------|-------------------------|---------------------------------------|------------------------------------|
| P1T1                   | 65,814,500              | 98.3%                                 | 102.71                             |
| P1T2                   | 66,880,972              | 98.67%                                | 104.37                             |
| P1T3                   | 65,419,166              | 98.78%                                | 101.8                              |
| P1T4                   | 84,390,186              | 98.4%                                 | 116.47                             |
| P1T5                   | 112,964,310             | 98.31%                                | 148.57                             |
| P1B                    | 86,212,742              | 98.5%                                 | 132.34                             |
| P2T1                   | 85,105,156              | 98.46%                                | 129.98                             |
| P2T2                   | 76,539,942              | 98.64%                                | 114.33                             |
| P2T3                   | 73,344,058              | 99%                                   | 114.88                             |
| P2T4                   | 58,418,786              | 97.94%                                | 91.18                              |
| P2T5                   | 81,787,546              | 98.31%                                | 110.4                              |
| P2B                    | 86,984,966              | 97.56%                                | 138.11                             |
| P3T1                   | 80,146,504              | 98.99%                                | 127.41                             |
| P3T2                   | 86,694,488              | 98.97%                                | 137.09                             |
| P3T3                   | 80,690,118              | 98.85%                                | 128.22                             |
| P3T4                   | 82,881,802              | 98.84%                                | 130.52                             |
| P3T5                   | 88,595,180              | 98.64%                                | 136.84                             |
| P3B                    | 78,039,534              | 98.53%                                | 126                                |
| P4T1                   | 90,428,994              | 99.07%                                | 142.8                              |
| P4T2                   | 76,947,750              | 98.58%                                | 117.86                             |
| P4T3                   | 84,269,948              | 98.52%                                | 128.47                             |
| P4T4                   | 107,154,858             | 99.02%                                | 168.67                             |
| P4T5                   | 107,965,250             | 98.68%                                | 165.7                              |
| P4B                    | 87,596,086              | 97.23%                                | 135.55                             |
| P5T1                   | 83,422,780              | 98.89%                                | 128.31                             |
| P5T2                   | 75,018,196              | 98.74%                                | 116.96                             |
| P5T3                   | 75,814,054              | 98.89%                                | 117.77                             |
| P5T4                   | 66,171,166              | 98.72%                                | 105.98                             |
| P5T5                   | 100,051,398             | 98.35%                                | 155.22                             |
| P5B                    | 83,748,418              | 97.85%                                | 131.64                             |

<sup>a</sup>P: patient, T: tumor, B: peripheral blood, P1T1 represent tumor region 1 of patient 1.

**Supplementary Table 5: Summary of non-synonymous somatic mutations identified in the five PLC patients. See Supplementary\_Table\_5**

**Supplementary Table 6: Mutations verification by Sanger sequencing in all the patients**

| <b>Patient</b>                             | <b>P1</b> | <b>P2</b> | <b>P3</b> | <b>P4</b> | <b>P5</b> |
|--------------------------------------------|-----------|-----------|-----------|-----------|-----------|
| N0. of successfully sequenced mutations    | 98        | 91        | 67        | 68        | 106       |
| N0. of mutations were selection to verify  | 75        | 70        | 52        | 56        | 80        |
| Total N0. of samples for verifying         | 375       | 350       | 260       | 280       | 400       |
| Total No. of successfully verified samples | 368       | 341       | 247       | 276       | 384       |
| Verification rate %                        | 98.13%    | 97.43%    | 95%       | 98.57%    | 96%       |
| Average verification rate                  | 97.03%    |           |           |           |           |

**Supplementary Table 7: TCR sequencing primers. See Supplementary\_Table\_7**
